## Social epigenetic effects in dopaminergic neurons

1

# 2 **Social isolation-induced epigenetic and transcriptional changes in *Drosophila*** 3 **dopaminergic neurons**

4

5 Pavan Agarwal<sup>1</sup>, Phuong Chung<sup>1</sup>, Ulrike Heberlein<sup>1</sup>, Clement Kent<sup>1,2</sup>

6 1. Janelia Research Campus, Howard Hughes Medical Institute, Ashburn VA USA

7 2. Department of Biology, York University, Toronto Canada

8

9

### **Abstract**

10 Epigenetic mechanisms play fundamental roles in brain function and behavior and stressors such as social  
11 isolation can alter animal behavior via epigenetic mechanisms. However, due to cellular heterogeneity,  
12 identifying cell-type-specific epigenetic changes in the brain is challenging. Here we report first use of a  
13 modified INTACT method in behavioral epigenetics of *Drosophila*: a method we call mini-INTACT. Using  
14 ChIP-seq on mini-INTACT purified dopaminergic nuclei, we identified epigenetic signatures in socially-  
15 isolated and socially-enriched *Drosophila* males. Social experience altered the epigenetic landscape in  
16 clusters of genes involved in transcription and neural function. Some of these alterations were predicted by  
17 expression changes of four transcription factors and the prevalence of their binding sites in several clusters.  
18 These transcription factors were previously identified as activity-regulated genes and their knockdown in  
19 dopaminergic neurons reduced the effects of social experience on sleep. Our work enables the use of  
20 *Drosophila* as a model for cell-type-specific behavioral epigenetics.

21

## Social epigenetic effects in dopaminergic neurons

22

23

### Introduction

24

25

26

27

28

29

30

31

Environmental stressors have robust effects on the behavior of animals including humans, rodents and fruit flies. Social isolation is considered a form of ‘passive’ stress that can profoundly affect behaviors by inducing anxiety and depression-like symptoms (Grippe et al., 2007; Hall, 1998; Wallace et al., 2009). For instance, solitary confinement in humans has been shown to induce depressive symptoms, increased aggression (Ferguson et al., 2005) and increased risk for suicide (Kaba et al., 2014; Reeves and Tamburello, 2014). In addition, social isolation is known to affect sleep quality and duration in humans (Cacioppo et al., 2000; Friedman, 2011), mice (Febinger et al., 2014; Greco et al., 1988) and the fruit fly *Drosophila melanogaster* (Brown et al., 2017; Ganguly-Fitzgerald et al., 2006).

32

33

34

35

36

37

38

39

40

41

42

43

Epigenetic mechanisms engaged by stressors such as early life adversity (Champagne, 2010; McGowan and Szyf, 2010), reduced maternal care (Weaver et al., 2004), maternal separation (Pusalkar et al., 2015; Sasagawa et al., 2017), drugs of abuse (Chase and Sharma, 2013; Gozen et al., 2013; Jung et al., 2016; Renthal et al., 2009; Wang et al., 2007), and social defeat (Valzania et al., 2017) play a key role in influencing gene expression in the brain. Social isolation has been shown to cause epigenetic changes in the midbrain of mice (Siuda et al., 2014) and an increase in DNA methylation in dopaminergic neurons (Niwa et al., 2013; Niwa et al., 2016). Several studies have implicated dopaminergic neurons in the effects of social isolation in rodents (Hall et al., 1998; Jones et al., 1992; Sasagawa et al., 2017) and social isolation has been shown to decrease dopamine levels in flies (Ganguly-Fitzgerald et al., 2006) and mice (Niwa et al., 2013). Dopaminergic neurons play an important role in modulating behaviors influenced by social isolation in *Drosophila*, including aggression (Alekseyenko et al., 2013), sleep (Ganguly-Fitzgerald et al., 2006; Liu et al., 2012a; Pimentel et al., 2016; Sitaraman et al., 2015; Ueno et al., 2012), and alcohol intoxication (Bainton

## Social epigenetic effects in dopaminergic neurons

44 et al., 2000). It is not known, however, how stressors such as social isolation influence the epigenome in  
45 specific cell types of the brain to affect behavior.

46 The brain is a highly heterogeneous tissue. This poses a challenge for epigenomic studies since ChIP-  
47 seq and RNA-seq data obtained from brain tissue are significantly more variable than data obtained from  
48 other tissue types or cells in culture (Maze et al., 2014). This is especially challenging for small model  
49 organisms such as *Drosophila*, where manually dissecting subsets of brain regions for epigenomic analysis  
50 is not possible. Consequently, studies of behavioral epigenetics in *Drosophila* have used either mutants or  
51 flies in which the GAL4-UAS system (Brand and Perrimon, 1993) was used to modulate levels of epigenetic  
52 writers or erasers (Anreiter et al., 2017; Anreiter et al., 2019; Fitzsimons et al., 2013; Gupta et al., 2017;  
53 Johnson et al., 2010; Koemans et al., 2017; Kramer et al., 2011; Perry et al., 2017; Schwartz et al., 2016;  
54 Taniguchi and Moore, 2014; van der Voet et al., 2014; Xu et al., 2014b). Studies that looked at global  
55 epigenetic changes using ChIP-seq have used either entire fly heads or whole animals after drug treatment or  
56 epigenetic mutation (Ghezzi et al., 2013; Kramer et al., 2011; Wang et al., 2007).

57 Strategies to isolate specific cell types from brains, such as laser capture microdissection (Emmert-  
58 Buck et al., 1996) or manual sorting of neurons (Hempel et al., 2007; Nagoshi et al., 2010) do not provide  
59 enough material for epigenomic analysis. A popular approach for cell type-specific epigenomic analysis is  
60 INTACT (isolation of nuclei tagged in specific cell types) (Deal and Henikoff, 2010). INTACT allows the  
61 isolation of specific cell types using tagged nuclei that are affinity purified from a heterogeneous cell  
62 population. Recent advances in INTACT have made it possible to use this method in *C. elegans* (Steiner et  
63 al., 2012), *Drosophila* (Henry et al., 2012), and mouse (Mo et al., 2015; Mo et al., 2016) for epigenomic and  
64 proteomic (Amin et al., 2014) analyses. Despite its versatility, to the best of our knowledge, no studies to  
65 date have utilized INTACT for analysis of rare cell types in the field of behavioral epigenetics. INTACT in  
66 mouse has been shown to work with 1-3% of total adult neuronal nuclei (Mo et al., 2015) and epigenetic  
67 analysis with ChIP-seq required ~0.5-1 million purified neuronal nuclei (Mo et al., 2016). INTACT in

## Social epigenetic effects in dopaminergic neurons

68 *Drosophila* either requires thousands of animals to access rare cell types (Henry et al., 2012) or the use of  
69 pan-neuronal or pan-gial drivers to obtain sufficient nuclei for epigenetic analysis (Henry et al., 2012; Ma  
70 and Weake, 2014; Ye et al., 2017). This represents a significant barrier for the field of behavioral epigenetics,  
71 in which rare cell types need to be collected in restricted time windows and where collecting tissue from  
72 large number of animals would be difficult.

73 To address these issues, we developed a modification of the INTACT method, mini-INTACT, which  
74 uses approximately 100-fold less material. We used mini-INTACT to purify nuclei from dopaminergic  
75 neurons, which comprise less than 0.1% of fly brain neurons. We used 200-250 fly heads (10-15,000 nuclei)  
76 of socially-isolated and socially-enriched flies and ascertained epigenetic changes on a genome-wide scale  
77 using ChIP-seq. Comparing the enrichment profiles of six different histone modification marks with mRNA  
78 expression levels in dopaminergic neurons obtained by RNA-seq revealed clusters of genes that may  
79 contribute to the effects of social isolation and social enrichment. Our unsupervised clustering analysis  
80 followed by gene ontology (GO) analysis of these groups showed an enrichment of genes encoding readers  
81 and writers of the epigenome, cell signaling molecules, and molecules involved in neural and behavioral  
82 processes. We found that some genes encoding activity-regulated transcription factors (ARG-TFs) (Chen et  
83 al., 2016) respond to social environment in dopaminergic neurons, and that knockdown of the genes encoding  
84 four of these ARG-TFs (*cabut*, *Hr38*, *stripe*, *CrebA*) reduced the effects of social experience on daytime  
85 sleep. Taken together, these data show that the epigenetic landscape of dopaminergic neurons undergoes  
86 modifications with just four days of social isolation in adult male flies and that ARG-TFs are part of these  
87 changes.

88

89

## Social epigenetic effects in dopaminergic neurons

90

### Results

#### 91 **mini-INTACT purifies rare cell types from adult *Drosophila* brain**

92 The INTACT method developed in *Drosophila* expresses a SUN domain protein (UNC84) from *C.*  
93 *elegans* that localizes GFP to the inner nuclear membrane (*unc84-2xGFP*) (Henry et al., 2012). While the  
94 INTACT method works well to isolate specific cell types from *Drosophila*, it requires thousands of fly heads  
95 to access rare cell types. This represents a significant challenge for the field of behavioral epigenetics, where  
96 animals need to be perturbed and collected in restricted temporal windows, and where manually manipulating  
97 large number of animals is difficult. To address this issue, we modified the INTACT method to isolate rare  
98 cell types (<0.1% of adult *Drosophila* brain) from 200-250 fly heads; we named this modified method mini-  
99 INTACT (Figure 1A and Materials and Methods).

100 To achieve this ~50-100-fold reduction in input material, we made several changes to the protocol  
101 (see Materials and Methods for details), including an improved homogenizer design to prevent sample loss  
102 (Figure 1 - Figure Supplement 1); a 20-fold reduction in homogenization and immunoprecipitation volume;  
103 the use of a single buffer system for homogenization, immunoprecipitation and washing; and the sequential  
104 addition of anti-GFP antibodies and magnetic beads directly to the homogenate for increased binding  
105 efficiency.

106 We expressed the INTACT transgene in dopaminergic neurons using the tyrosine hydroxylase driver,  
107 *TH-GAL4* (Friggi-Grelin et al., 2003), which is expressed in ~120 neurons in the adult brain (Azanchi et al.,  
108 2013; Friggi-Grelin et al., 2003; White et al., 2010)(Figure 1B). We compared expression of the *TH-GAL4*-  
109 driven transgene *UAS-UNC84-2XGFP* in the adult brain after varying the copy number of the upstream  
110 activator sequences (UAS) from 3X to 5X and 10X. The *3X-UAS-unc84-2XGFP* transgene most faithfully  
111 reproduced *TH-GAL4* expression (Figure 1B); ectopic expression was seen when 5 or 10 copies of UAS-  
112 tagged GFP were used (Figure 1- Figure Supplement 2). Therefore, we used *3X-UAS-unc84-2XGFP* for all

## Social epigenetic effects in dopaminergic neurons

113 our experiments. Social isolation affects daytime sleep (Brown et al., 2017; Ganguly-Fitzgerald et al., 2006);  
114 we therefore tested for the effects of expression of the INTACT transgenes on daytime sleep using the  
115 *Drosophila* activity monitor. Expression of *3X-UAS-unc84-2XGFP* in dopaminergic neurons did not affect  
116 daytime sleep (Figure 1- Figure Supplement 3), leading us to conclude that the expression of the transgenes  
117 had no significant effects on fly behavior.

118 To assess purity of the isolated nuclei, we mixed 200 heads of flies expressing *UAS-UNC84-2XGFP*  
119 driven by *TH-GAL4* with 200 heads of flies expressing *UAS-UNC84-tdTomfl* driven by the pan-neuronal  
120 driver *elav-GAL4*. Processing these heads using mini-INTACT resulted in a ratio of ~120 GFP-positive green  
121 to  $10^5$  tdTomfl-positive red nuclei. Very few red nuclei were observed in the purified bead-bound sample as  
122 compared to green nuclei (Figure 1C-E). Therefore, the purity obtained by mini-INTACT (~98%, Figure 1-  
123 Figure Supplement 4) is comparable to that described for the INTACT method (Henry et al., 2012) that  
124 requires ~50-100 times more input material.

125 By manually counting various purified and diluted samples we assessed the yield of nuclei to be in  
126 the range of 30-50% (data not shown). Therefore, from the heads of 200-250 flies, we estimated a yield of  
127 10,000-15,000 dopaminergic nuclei for each ChIP-seq reaction. Dopaminergic neurons were obtained from  
128 *Drosophila* males that were either socially isolated or socially enriched for four days, hereafter referred to as  
129 single-housed (SH) and group-housed (GH) male flies, respectively. Chromatin was processed from these  
130 nuclei for ChIP-seq using six different histone modification marks as described in the Materials and Methods  
131 and below.

132 In summary, mini-INTACT allowed us to retrieve sufficient chromatin for ChIP-seq analysis of six  
133 histone marks from dopaminergic neurons of 200-250 flies for each housing condition.

134

## Social epigenetic effects in dopaminergic neurons

### 135 **Epigenomic profiling of dopaminergic neurons from socially isolated and socially enriched male flies**

136 The genome-wide profiles of activating and repressive marks (David et al., 2015) with respect to gene  
137 bodies are shown in ngs.plot displays (Shen et al., 2014) averaged over the genome (Figure 2A-F). As  
138 expected from previous studies with human cells (Barski et al., 2007; Mikkelsen et al., 2007), flies  
139 (Kharchenko et al., 2011; Kramer et al., 2011), and mouse brain (Feng et al., 2014), activating marks  
140 H3K4me3, H3K27ac and H3K9/K14ac were maximally enriched downstream of the transcription start site  
141 (TSS) (Figure 2A-C), while H3K36me3, which has been associated with transcriptional elongation, is skewed  
142 towards transcription end site (TES) with enrichment in the gene body (Figure 2D). Repressive marks  
143 H3K9me3 and H3K27me3 were depleted from TSS and TES and enriched in the central portion of the gene  
144 body (Figure 2E-F).

145 As an example for transcriptional and epigenetic changes at a specific locus, we depict the highly-  
146 expressed *Dopa decarboxylase* (*Ddc*) gene, which is involved in dopamine synthesis. *Ddc* mRNA levels  
147 were upregulated in GH flies as compared to SH flies (Figure 2G), which is consistent with a previous study  
148 showing that the levels of dopamine are lower in the heads of socially-isolated flies (Ganguly-Fitzgerald et  
149 al., 2006). The epigenetic profile of this locus recapitulates the global profile, with marks associated with  
150 transcriptional activation (H3K4me3 and H3K27ac) centered around the TSS, H3K36me3 skewed towards  
151 the TES, and repressive marks H3K9me3 and H3K27me3 not showing enrichment as compared to input  
152 DNA. Comparative analysis of epigenetic profiles between GH and SH males using SICER (Zang et al.,  
153 2009) showed that the levels of the activating mark H3K4me3 were significantly higher in GH flies around  
154 the *Ddc* gene (normalized read count GH: 35.10, SH:30.58,  $p=0.0002$ ,  $p_{\text{adjusted}}=0.0004$ ), and that the  
155 activating mark H3K27ac was similarly increased (GH: 1069, SH: 651,  $p=1.5 \times 10^{-107}$ ,  $p_{\text{adjusted}} < 10^{-60}$ ) in  
156 agreement with the pattern of mRNA expression. Repressive marks, which were already very low on this  
157 gene, showed no significant differences.

## Social epigenetic effects in dopaminergic neurons

158           ChIP-seq replicates for histone modification marks were highly correlated (median Pearson's  $r$  of log-  
159 transformed coverage among all pairs of biological replicates,  $r > 0.99$  (Figure 2- Figure Supplement 1). The  
160 genome-wide correlation between levels of activating and repressive marks with each other and with mRNA  
161 levels is shown in Table 1. All activating mark levels correlate positively with each other and with mRNA  
162 levels, while repressive marks correlate positively with each other and negatively with mRNA levels, as  
163 expected. H3K9me2 and H3K9me3 modifications are associated with Heterochromatin Protein 1 (HP1)-  
164 mediated heterochromatin formation and transcriptional repression (David et al., 2015), however these  
165 modifications are not strongly correlated with transcriptional repression in either human cells (Barski et al.,  
166 2007) or *Drosophila* (Kramer et al., 2011). Consistent with these findings, we find correlations of H3K9me3  
167 to be weaker with mRNA levels and with activating marks when compared with the repressive mark  
168 H3K27me3.

169           Analysis of ChIP-seq data using SICER (Zang et al., 2009) returned thousands of "islands" in which  
170 epigenetic mark levels were significantly different between GH and SH males ( $FDR < 0.001$ ) (Supplement  
171 Table 1). Typically, an island does not cover the entirety of a gene, so interpretation of SICER islands requires  
172 care. For example, an H3K4me3 island with a fold change of 1.25 was found within the body of the *foraging*  
173 gene, from position 3,622,074 to 3,656,953 bp on chromosome 2L. This island covers the first exon of seven  
174 *foraging* transcripts, but not of the remaining 6 transcripts annotated in Flybase (Dos Santos et al.,  
175 2015)([www.flybase.org](http://www.flybase.org)). By contrast, an island in *Snmp2* covers half of the first exon of all three transcripts  
176 and has H3K4me3 fold change of 1.70. Details of SICER-detected islands are in Supplement Table 1.

177           In summary, when averaged over entire gene bodies there are small but statistically significant  
178 changes in histone marks, but when examined in islands detected by SICER there are much larger changes,  
179 often restricted to regions such as the first exon of a gene (for activating mark H3K4me3).



## Social epigenetic effects in dopaminergic neurons

### 180 **Social experience induces transcriptional changes in dopaminergic neurons**

181           Since most of the transcripts are exported from the nucleus soon after transcription (Rodriguez et al.,  
182 2004), nuclear RNA alone may not represent the transcriptional changes due to a four-day-long social  
183 experience. A recent study showed that considerable differences exist in the profiles of nuclear and cytosolic  
184 transcripts of individual cells (Abdelmoez et al., 2018). Therefore, to profile both nuclear and cytosolic  
185 mRNAs, we isolated dopaminergic neurons from GH and SH males using fluorescence activated cell sorting  
186 (FACS) and performed RNA-seq (see Materials and Methods). Replicate concordance was assessed using  
187 Pearson's  $r$  of log-transformed counts among all pairs of replicates ( $r=0.95$  for GH and  $r=0.91$  for SH flies).  
188 These correlations are similar to those reported before for RNA-seq from dopaminergic neurons (Abruzzi et  
189 al., 2017; Chen et al., 2016).

190           We used three methods (EdgeR, CyberT, and FCros) to identify genes that are differentially expressed  
191 in dopaminergic neurons of GH and SH flies (Dembélé and Kastner, 2014; Kayala and Baldi, 2012; Robinson  
192 et al., 2010). EdgeR and CyberT use generalizations of the between-treatment t-test method, while FCros  
193 uses a nonparametric method based on fold changes, which is more robust to variation in mRNA counts.  
194 Using EdgeR with a FDR of 5% (see Materials and Methods), we identified 16 genes upregulated in SH and  
195 9 genes upregulated in GH males (Supplement Table 2). The fold-change based technique FCros identified  
196 451 genes upregulated in SH and 466 upregulated in GH, after FDR correction of 5%. CyberT produced  
197 intermediate results. In figures and tables, we quote the FDR 0.05 obtained with FCros values, except where  
198 noted otherwise. Supplement Table 2 shows each gene reported as differentially expressed by any of the 3  
199 methods.

200           Gene Ontology analysis of all differentially-expressed genes (upregulated in both GH and SH males)  
201 using the DAVID GO tool (Huang et al., 2009) found two related GO groups: epigenetic (unadjusted  
202  $p=0.0098$ ) and negative regulation of gene expression ( $p=0.016$ ). GOrilla GO analysis (Eden et al., 2009)  
203 found peptide n-acetyltransferase activity ( $p=0.00044$ ), the latter group containing genes belonging to several

## Social epigenetic effects in dopaminergic neurons

204 histone acetyltransferase complexes genes including Tip60 complex members Enhancer of Polycomb and  
205 *dom*, SAGA complex members *Taf10b* and *Taf12*, TAC1 complex members *nejire* and *Sbf*, and Enok  
206 complex members *enok*, *Gas41* and *Ing5*. The full GOrilla analysis is shown in Supplement Data 1.

207 Daytime activity is significantly higher in SH flies as compared to GH flies (Ganguly-Fitzgerald et  
208 al., 2006), suggesting that metabolic activity might be higher in SH flies. It is also known that  
209 mitochondrially-encoded genes are upregulated in waking flies (Cirelli and Tononi, 1998). Consistent with  
210 these observations, in our RNA-seq dataset we found that of 15 known mitochondrially encoded genes, 14  
211 were higher in SH than in GH flies ( $p=0.0005$ , binomial test).

212 In summary, transcript levels of many genes expressed in dopaminergic neurons were changed by  
213 social housing conditions, including those of many epigenetic reader and writer genes.

## 214 Social experience alters epigenetic landscape

215 To understand how social experience affects the epigenetic landscape of dopaminergic neurons, we  
216 focused on epigenetic changes observed in the top 40% of genes by mRNA expression levels (“expressed  
217 genes”). We clustered the z-score normalized differences between GH and SH flies for all 6 epigenetic marks  
218 and for mRNA, and performed k-means clustering as in Shen *et al.* (2013) (see Materials and Methods and  
219 Figure 3- Figure Supplement 1). Eight clusters provided optimal separation of genes (elbow test). These  
220 clusters, arranged in increasing order of mean mRNA expression levels, are shown as a heat map of mRNA  
221 and epigenetic mark z-score values in Figure 3, with red showing marks/mRNAs that are higher in GH flies  
222 and blue showing those that are higher in SH flies.

223 The first five clusters are enriched for house-keeping functions, and include mitochondrial, ribosomal,  
224 and proteasome genes. However, the last three clusters (6-8, containing genes with higher expression) are  
225 enriched in neural and regulatory functions.

## Social epigenetic effects in dopaminergic neurons

226 Cluster 6 is enriched for genes with epigenetic functions, including histone acetyltransferase (HAT)  
227 genes. As noted above, HAT genes and several epigenetic regulators encode differentially expressed  
228 mRNAs; but as can be seen in the left-hand column (mRNA z-score), mRNA level changes are  
229 heterogeneous, as some genes in this cluster are upregulated in GH males (red) and others in SH males (blue).  
230 This is interesting considering that the k-means analysis grouped genes in this cluster not primarily by the  
231 direction of their mRNA change with regard to housing condition, but by their epigenetic mark changes; this  
232 cluster is enriched for readers and writers of epigenetic marks.

233 The seventh cluster is enriched for genes regulating neural function (some of which are members of  
234 the MAPK or WNT signaling pathways), transcription factors, and glycolysis genes. In this cluster there is a  
235 pair of marks that show strong, anti-correlated changes: Heterochromatin Protein 1 (HP1)-associated  
236 H3K9me3 (higher in GH than SH) and the Polycomb repressive complex 2 (PRC2)-associated H3K27me3  
237 mark (higher in SH than GH).

238 The two inhibitory marks also change in opposite directions in the final (highest expression) cluster  
239 8, but in this cluster the directions of change are reversed. H3K9me3 in cluster 8 is higher in SH than GH  
240 males and H3K27me3 is higher in GH than SH males. This cluster is enriched in neural function genes,  
241 including those involved in male mating behavior, learning and memory, synaptic, neuropeptide and  
242 serotonin signaling, as well as ion channels and transcription regulation genes. Genes of this cluster have on  
243 average higher expression in SH flies than in GH ( $p < 10^{-15}$ ,  $t = -15.06$ ,  $df = 1361$ ).

244 In summary, there are clusters of genes whose epigenetic marks and mRNA levels respond to social  
245 experience in similar ways within each cluster, but quite differently between clusters. This suggests that  
246 different regulatory programs may be acting in each cluster. We use this putative division of genes into  
247 epigenetically distinct clusters to try to determine what the regulatory program might be in the next section.

## Social epigenetic effects in dopaminergic neurons

### 248 **Social enrichment induces activity-regulated genes in dopaminergic neurons**

249 We used the Centrimo tool (Bailey and Machanick, 2012) to search for transcription factors (TFs)  
250 whose binding sites might be enriched (occur more often than chance) in promoter-proximal regions of genes  
251 expressed in dopaminergic neurons. The 8 epigenetic clusters discussed in the previous section provided us  
252 with groups of genes that had similar regulatory programs (as evidenced by their epigenetic and  
253 transcriptional response to housing conditions). We used Centrimo to search for TFs whose binding sites  
254 were enriched in genes of each cluster relative to a control group of the same number of genes randomly  
255 chosen from other clusters. The promoter-proximal region ( $\pm 500$  bp from TSS) was scanned. We found a  
256 group of 24 TF motifs that were enriched in one or more of the clusters' promoter regions. These correspond  
257 to 14 TF genes, as in many cases multiple binding motifs are documented for one TF in the motif databases  
258 used by Centrimo (Supplement Data 2).

259 We further filtered the TFs under investigation by two criteria: 1) the TF had to be in the expressed  
260 gene set and 2) the TF had to show at least a 33.3% change in transcript levels in response to housing  
261 conditions. Five TFs met our criteria: Hr38 (Hormone receptor-like in 38), Sr (Stripe), CrebA, Cbt (Cabut),  
262 and Pho (Pleiohomeotic). Interestingly, the genes encoding four of these TFs (*Hr38*, *sr*, *CrebA* and *cbt*) are  
263 orthologs of vertebrate immediate early genes (Hu et al., 2011). The expression of these genes was higher in  
264 GH males than in SH males. We hypothesized, consistent with another study (Ganguly-Fitzgerald et al.,  
265 2006), that being in the GH environment constitutes an enrichment of stimuli for male flies. In a recent study  
266 (Chen et al., 2016) the Rosbash group thermogenetically stimulated dopaminergic neurons by expressing  
267 dTRPA1 using the *TH-GAL4* driver and measured changes in mRNA levels after 60 minutes. Genes with  
268 large transcriptional upregulation due to neuronal stimulation were called "Activity Related Genes" (ARGs).  
269 We compared the change in expression levels (log-fold change) of the top 50 upregulated ARGs in  
270 dopaminergic neurons found by Chen *et al.* with the change of gene expression in dopaminergic neurons  
271 between GH and SH males in our dataset; we found a significant positive correlation ( $r=0.41$ ,  $p=0.003$ ).

## Social epigenetic effects in dopaminergic neurons

272 Interestingly, changes in the levels of some histone marks observed between GH and SH males also correlated  
273 significantly with Chen *et al.*'s changes in expression of ARGs upon neuronal stimulation: H3K9me3 ( $r=-$   
274 0.35,  $p=0.01$ ), H3K27me3 ( $r=0.46$ ,  $p=0.0009$ ) and H3K4me3 ( $r=0.32$ ,  $p=0.026$ ). This result suggests that  
275 genes in dopaminergic neurons responding to short-term direct neural stimulation also respond epigenetically  
276 and transcriptionally to the long-term presumed behavioral stimulation of dopaminergic neuron due to  
277 interaction among GH flies over the course of four days.

278 Four transcription factors were among the genes that showed the largest upregulation in response to  
279 direct neuronal stimulation: Hr38, sr, CrebA, and Cbt (Chen *et al.*, 2016). All four of these TFs were also  
280 upregulated in our RNA-seq data in GH as compared to SH males (Figure 4A), suggesting that they might  
281 regulate transcriptional responses of other genes in response to group housing. Interestingly, a recent study  
282 of gene expression in the *Drosophila* midbrain found that transcription of these ARGs was correlated across  
283 many types of neurons (Croset *et al.*, 2018) under normal conditions – that is, there appears to be a common  
284 regulatory program across neural cell types for these genes. The epigenetic effects of social housing on marks  
285 were more highly correlated (by 2.4 times) among these ARGs than among all genes ( $t=2.336$ ,  $df=20$ ,  
286  $p=0.03$ ). Of the 10 genes found by Croset *et al.*, 9 were also present in our top 40% expressed genes in  
287 dopaminergic neurons (Figure 4, B). These 9 ARGs had GH/SH fold changes ranging from 1.44 to 2.11  
288 (mean 1.70;  $p=0.004$ , binomial test; Supplement Table 3). Similarly, genes with log fold change above 1.5  
289 in Figure 4 of Chen *et al.* 2016 had high log fold changes in our data (Figure 4 B, Chen *et al.* high), while  
290 lower fold change genes from the same Chen dataset had fold changes in our data not different from zero  
291 (Fig. 4 B, Chen *et al.* low) showing that fold change sizes in this set of genes seems to be conserved across  
292 experimenters and conditions.

293 In summary, several ARGs expressed in dopaminergic neurons respond similarly to 4 days of social  
294 housing and 60 minutes of thermogenetic stimulation. We report below the effects of these ARG transcription

## Social epigenetic effects in dopaminergic neurons

295 factors on downstream targets using both bioinformatic analysis and by manipulating levels of these ARG  
296 TFs in dopaminergic neurons and measuring the effect on sleep.

### 297 **ARGs predict transcriptional changes due to social experience**

298 It has been suggested that ARGs may in some cases act as transcriptional repressors to fine tune  
299 responses to neuronal stimulation (Croset et al., 2018). To test if the factor encoded by the ARG *cbt* is acting  
300 as a transcriptional repressor, we compared a published dataset for *cbt* (Bartok et al., 2015) with our data. In  
301 the *Bartok et al.* study, genome-wide transcriptional responses were measured upon overexpression and  
302 knockdown of *cbt* in adult male fly heads. We used mRNA expression from this study to define two sets of  
303 genes: ‘repressed by Cbt’ and ‘activated by Cbt’. The ‘repressed by Cbt’ set contains genes whose expression  
304 is increased upon *cbt* knockdown and decreased upon *cbt* overexpression (Supplement Table 4). Conversely,  
305 the ‘activated by Cbt’ set contains genes whose expression is decreased upon *cbt* knockdown and increased  
306 upon *cbt* overexpression (Supplement Table 5). *cbt* is up-regulated by 94% in dopaminergic neurons of GH  
307 males compared to SH males. Hence, if Cbt indeed acts as a transcriptional repressor in dopaminergic  
308 neurons, we should see downregulation of genes repressed by Cbt and/or upregulation of genes activated by  
309 Cbt in GH males. To test this, we compared gene expression between the two datasets using the top 40% of  
310 expressed genes in dopaminergic neurons. Consistent with our hypothesis, we found reduced expression of  
311 genes repressed by Cbt in GH males compared to SH males (two-sided Student t:  $t=-3.31$ ,  $df=1143$ ,  
312  $p=0.0001$ ). Genes activated by Cbt were upregulated in GH males, although this effect was not statistically  
313 significant ( $t=1.30$ ,  $df=269$ ,  $p=0.196$ ). Thus, Cbt appears to act primarily as a transcriptional repressor in  
314 dopaminergic neurons in response to social stimulation: it is higher in GH than in SH neurons, and genes  
315 repressed by it in heads (Bartok et al., 2015) are lower in dopaminergic neurons in GH compared to SH  
316 males.

## Social epigenetic effects in dopaminergic neurons

317 We next analyzed the effects of housing on the six histone marks in the two sets of Cbt-regulated  
318 genes. For each mark, the difference between the two gene sets was significant at p values ranging from  $10^{-12}$   
319 to  $10^{-32}$ . The activating marks H3K4me3, H3K36me3, and H3K9-14ac, and the repressive mark  
320 H3K27me3 were higher in GH males in ‘repressed by Cbt’ genes than in ‘activated by Cbt’ genes. By  
321 contrast, the marks H3K27ac and H3K9me3 were higher in SH males in the ‘repressed by Cbt’ genes than  
322 in the ‘activated by Cbt’ genes (Figure 4C). Interestingly, genes in the ‘repressed by Cbt’ group were over-  
323 represented in our eighth k-means cluster (Figure 3) containing genes involved in neuronal function (odds  
324 ratio 1.7:1, chi-squared 95.9, df=1,  $p=1.8*10^{-22}$ ). We present a hypothesis for this unusual pattern of mark  
325 changes in the Discussion.

326 If any of the four ARG-TFs (*Hr38*, *cbt*, *CrebA* and *sr*) are acting as transcriptional repressors, as  
327 suggested by (Croset et al., 2018) and as shown above for *cbt* in dopaminergic neurons, there should be sets  
328 of target genes that are down-regulated in GH flies, since these ARG-TFs are up-regulated upon group  
329 housing. To test this, we performed multi-linear regressions (see Materials and Methods and Supplement  
330 Data 3) with expression level change (mRNA log fold change) between GH and SH males as the dependent  
331 variable and the number of TF binding motifs per gene in a 1000 bp region centered on the TSS as the  
332 independent variable. The motifs used were for the four TFs in the ARG group and for TF encoded by *pho*  
333 (associated with PRC2-mediated epigenetic regulation) (Nitta et al., 2015; Zhu et al., 2011), whose binding  
334 motifs were enriched in genes of the 8 clusters described above (Figure 3) (see Materials and Methods and  
335 Supplement Data 2).

336 We did the above multilinear regressions for several functional sets of genes that were (a) enriched  
337 in the three clusters containing genes expressed at medium or high levels (clusters 6, 7 and 8, Figure 3), (b)  
338 involved in epigenetic regulation or neural function, and (c) relevant to male fly behavior. Since GO analysis  
339 is ineffective in functionally classifying small sets of genes, we manually categorized these genes in each  
340 group using their functions defined in Flybase. Genes in the following 9 functional groups were identified:



## Social epigenetic effects in dopaminergic neurons

341 sleep, neuropeptide, male mating, G-protein signaling, ligand-gated ion channel, catecholamine metabolism,  
342 MAPK signaling, and certain epigenetic genes (Table 2). The writers and erasers of marks were grouped by  
343 whether their marks tend to activate or repress gene transcription.

344 Interestingly, significant amounts of mRNA change between GH and SH flies were explained by TF  
345 binding sites in these functional groups, as shown in Table 2. The table shows the *r* and *p*-values for the  
346 regressions, and which TF motifs were significantly different. *Hr38*, *cbt*, *CrebA*, and *sr* putative binding sites  
347 each show a significant connection to mRNA change in one or more of the 6 functional gene groups. Of note,  
348 in eight out of nine functional groups where ARG-TFs motifs were significantly different, the direction of  
349 the effect of *Hr38*, *cbt*, and *CrebA* binding sites was negative – that is, the more potential binding sites the  
350 TF had in a gene, the lower the difference in mRNA between GH and SH flies was. This is consistent with  
351 the putative role of ARGs as transcriptional repressors for some genes. By contrast, *pho*, known primarily as  
352 a transcriptional repressor (Brown et al., 1998), showed a consistent positive effect on fold change between  
353 GH and SH flies.

354 In summary, changes in the numbers of a few putative transcription factor binding sites were  
355 sufficient to predict mRNA changes due to housing in ten functionally relevant gene groups with *r* values  
356 ranging from 0.25 to 0.86 (Table 2). The influence of ARGs on differential transcription in GH and SH males  
357 in biologically relevant gene groups led us to hypothesize that ARGs might also affect phenotypes known to  
358 vary with housing conditions.

359

## 360 **Regulation of social isolation-induced behavior by ARGs**

361 Social isolation has a robust influence on behavior; for example, SH flies show reduced daytime sleep  
362 when compared to GH flies (Brown et al., 2017; Ganguly-Fitzgerald et al., 2006). Having shown a potential  
363 involvement of ARG-TFs in regulating some genes differentially-expressed in dopaminergic neurons of GH  
364 and SH males, we knocked-down expression of these ARG-TFs in *TH-GAL4* neurons and assayed the males



## Social epigenetic effects in dopaminergic neurons

365 for their sleep patterns. Specifically, we quantified the differences in sleep between GH and SH males (or  
366  $\Delta$ Sleep as described by Ganguly *et al.* 2006) in which these ARGs and epigenetic modifiers were  
367 downregulated in dopaminergic neurons using RNA interference. Knockdown of all four ARG-TFs (*CrebA*,  
368 *Hr38*, *cbt*, and *sr*), significantly reduced  $\Delta$ Sleep (Figure 5A-C, Supplement Data 4). These data show that  
369 these ARG-TFs play significant roles in regulating social effects on sleep in dopaminergic neurons.

370 Our bioinformatic analysis suggested that these ARG-TFs might act as transcriptional repressors on  
371 downstream targets. Further analysis suggested that genes repressed by Cbt (Bartok et al., 2015) have  
372 reductions in H3K27ac and increases in H3K27me3 marks (Figure 4C). *Brms1* is a member of the histone  
373 deacetylase Sin3A repressor complex that contributes to PRC2 activity by deacetylating H3K27, thus  
374 allowing H3K27me3 to increase (Spain et al., 2010), and its transcription was also upregulated in GH flies.  
375 *Brms1* knockdown also significantly reduced  $\Delta$ Sleep (Figure 5- Figure Supplement1), which is consistent  
376 with effects of Cbt on  $\Delta$ Sleep (Figure 5 C).

377

378

## Discussion

379 Results from this study provide insights into how social experiences, such as social isolation and  
380 social enrichment, can affect the epigenome of a small, well defined neural population in the adult *Drosophila*  
381 brain. We miniaturized the INTACT method, mini-INTACT, and examined epigenetic changes in a rare cell-  
382 type isolated from 200-250 adult fly heads. We carried out ChIP-seq on mini-INTACT purified dopaminergic  
383 neuronal nuclei for six different histone modification marks and correlated it to transcriptional profiles  
384 determined by RNA-seq. We found changes in the epigenetic landscape in dopaminergic neurons upon social  
385 experience in several gene-clusters. Our analysis identified four ARG-TFs (Chen et al., 2016) responding to  
386 social enrichment in dopaminergic neurons. RNAi-mediated knockdown of all four of these ARG-TFs

## Social epigenetic effects in dopaminergic neurons

387 (*cabut*, *Hr38*, *stripe*, *CrebA*) as well as an epigenetic eraser *Brms1* reduced the effects of social experience  
388 on daytime sleep (Figure 5, Supplement Data 4).

389 K-means clustering identified several differences in the epigenetic and transcriptional landscape that  
390 correlate with social experience. Curiously, many of the genes with highest mean mRNA expression levels  
391 also have higher levels of the repressive H3K27me3 mark and lower levels of some activating marks (Figure  
392 3, cluster 8). In clusters of genes with lower expression levels, a more classical pattern of high levels of  
393 activating marks and low levels of repressive marks was found. But as the expression levels increase from  
394 these “classical” gene clusters towards the higher expression clusters (Figure 3, cluster 8), some activating  
395 marks drop and some repressive marks rise. In fully repressed genes, repressive PRC2-related H3K27me3  
396 levels are uniformly higher than repressive PRC1-related H3K9me3 levels. However, in the transition from  
397 classical pattern of marks to the higher expression paradoxical pattern, H3K9me3 increases before  
398 H3K27me3.

399 Dopaminergic neurons in the fly brain are essential parts of circuits involved in learning and memory  
400 (Burke et al., 2012; Liu et al., 2012b; Waddell, 2013). Ganguly *et al.* showed that increased daytime sleep in  
401 GH males was associated with higher brain dopamine levels, and that it could be blocked by ablation of  
402 dopaminergic neurons or loss-of-function alleles of many learning and memory genes (Ganguly-Fitzgerald  
403 et al., 2006). Our finding that some genes highly expressed in dopaminergic neurons are associated with  
404 unusual pattern of epigenetic marks (Figure 3, cluster 7 and 8) is consistent with the finding that mouse  
405 differentiated dopaminergic neurons still contain substantial numbers of genes labelled "PRCa" or Polycomb  
406 Repressive Complex - Active, with both active transcription but also presence of repressive H3K27me3  
407 marks (Ferrai et al., 2017). Another recent study found that in embryonic stem cells such PRCa genes have  
408 a higher variability of gene expression (Kar et al., 2017). Taken together, we suggest that some of the genes  
409 in fly dopaminergic neurons that show a change in expression between SH and GH males may be similar to  
410 those called PRCa genes in mouse dopaminergic neurons.

## Social epigenetic effects in dopaminergic neurons

411 In the search for insect equivalents of immediate early genes, the Rosbash group identified ARGs in  
412 dopaminergic neurons (Chen et al., 2016). The fold change in response to stimulation in their top 50 ARGs  
413 correlates significantly with the fold changes we measured in mRNA in response to putative stimulation  
414 provided by group housing. The top 50 ARG fold changes in Chen *et al.* also correlate significantly with GH  
415 versus SH fold changes in H3K4me3, H3K9me3, and H3K27me3 in dopaminergic neurons in our study.  
416 Genes encoding four transcription factors (*Creba*, *Hr38*, *sr* and *cbt*) are in the top genes by fold-change in  
417 both the Rosbash study (Chen et al., 2016), and in our own data.

418 *Hr38* and *stripe* have recently been shown to be activity-regulated in the honey bee and to affect  
419 dopamine pathway genes (Singh et al., 2018). *Hr38* is a homolog of vertebrate immediate early genes  
420 NR4A1-3, and has been shown to regulate dopaminergic neuron transcription and development (Eells et al.,  
421 2012; Kadkhodaei et al., 2009; Zetterström et al., 1996). In flies, *Hr38* overexpression increases dopamine  
422 decarboxylase (*Ddc*) transcription in the larval brain (Davis et al., 2007). In our data *Hr38* and *Ddc* are  
423 significantly higher in GH than in SH flies (Figure 2F and Figure 4A). Thus, although ARGs are co-expressed  
424 in a much broader range of neural types than just dopaminergic neurons (Croset et al., 2018) in the adult fly  
425 brain, they may have specific effects in dopaminergic neurons.

426 *Cbt* is a transcriptional repressor in some contexts, for instance in adult male fly heads (Bartok et al.,  
427 2015). Its vertebrate ortholog KLF10/TIEG1 acts with epigenetic repressors such as the H3K4 demethylase  
428 JARID1/KDM5B (Kim et al., 2010) and H3K27 deacetylase BRMS1 in the Sin3A complex (Belacortu et al.,  
429 2012; Muñoz-Descalzo et al., 2007; Spittau et al., 2007). Notably, if H3K27ac is deacetylated by BRMS1,  
430 this allows for the creation of the PRC2 mark H3K27me3 (Spain et al., 2010). We identified genes that were  
431 repressed or enhanced by *Cbt* and were in our top 40% expression range. These genes had highly significant  
432 differences in social-housing effects on mRNA and epigenetic mark levels, including downregulation in GH  
433 mRNA and H3K27ac and upregulation in GH H3K27me3 marks (Figure 4C).

## Social epigenetic effects in dopaminergic neurons

434 RNAi knockdown of *Brms1* reduced the social housing effect on daytime sleep in the similar manner  
435 as *cbt* knockdown. Thus, we have a consistent picture in which genes repressed by *Cbt* (Bartok et al., 2015)  
436 have reductions in H3K27ac and increases in H3K27me3 marks (Figure 4C), and knockdown of the  
437 deacetylase for H3K27 produce effects on sleep similar to *cbt* (Figure 5- Figure Supplement 1). Further  
438 studies are needed to elucidate possible epigenetic pathways mediated by *CrebA*, *Hr38*, and *stripe*. Croset *et*  
439 *al.* suggest that the highly inter-correlated set of ARGs they found may have repressive effects on  
440 transcription in various brain regions, such as the mushroom body  $\gamma$  lobes (Croset et al., 2018). We found in  
441 our data that upregulation of some these genes (especially *cbt* and *Hr38*) in GH males is associated with  
442 downregulation of genes in some functional gene groups. These groups fall largely into the k-means cluster  
443 that has increases in PRC2-related marks (H3K27me3) in *TH-GAL4*-expressing dopaminergic neurons. This  
444 suggests a scenario where group housing stimulates ARG expression, and these TFs in turn down-regulate  
445 neural function genes in part by increasing PRC2 repressive marks.

446 *Drosophila* has been a successful model for neuro-genetics due to ease of manipulating flies,  
447 availability of large collection of genetic tools, and recent development of automated behavioral assays.  
448 Adaptation of cell-type specific epigenetic methods such as mini-INTACT can help leverage this potential  
449 to comprehensively study epigenetic changes in specific neurons across several paradigms including stress,  
450 drugs of abuse, neuro-degenerative disorders etc.

451

## 452 **Materials and Methods**

453 **Fly stocks & rearing:** *Drosophila melanogaster* in a Canton-S background were reared on standard fly food  
454 at 25°C at 65% relative humidity with a 12/12 h light/dark cycle. For social isolation and group housing  
455 experiments 24-48 hour-old males of a given genotype were housed individually or in groups of 20 in  
456 standard *Drosophila* vials (2.6 cm diameter X 9.3 cm high) for 4 days containing standard fly food. 3X-, 5X-

## Social epigenetic effects in dopaminergic neurons

457 and *10X-UAS-unc84-2XGFP* and *10XUAS\_unc84-tdTomfl* are as described (Henry et al., 2012) and were a  
458 kind gift of Henry Gilbert (Janelia Research Campus, VA, USA), *TH-GAL4* is as described (Friggi-Grelin et  
459 al., 2003). Tissue collections for genomic analysis were performed near morning activity peak, usually  
460 around ZT3-ZT5. The following TRiP RNAi lines (Perkins et al., 2015) were obtained from the Bloomington  
461 Stock Center for behavioral analysis: BL36303 (*y[1] v[1]; P{y[+t7.7]=CaryP}attP2*) no insert background  
462 control vs. RNAi lines: BL29377 (*Hr38*); BL31900 (*CrebA*); BL27701 (*Sr*). BL36304 (*y[1] v[1];*  
463 *P{y[+t7.7]=CaryP}attP40*) no insert background control vs. RNAi lines: BL42562 (*CrebA*); BL38276 (*cbt*)  
464 and BL42533 (*Brms1*).

465

466 **Immunostaining and imaging:** Fly brains were dissected in cold 1X phosphate buffered saline (PBS) and  
467 fixed in 2% paraformaldehyde made in 1X PBS at room temperature for 1 h on a nutator, washed 4 times for  
468 20 min each in PAT (1X PBS, 0.5% PBS Triton, 1% BSA) at room temperature, blocked for 1 hour at room  
469 temperature with blocking buffer (PAT + 3% Normal Goat Serum) and incubated with primary antibodies,  
470 diluted in blocking buffer, overnight on a nutator at 4°C. The primary antibodies used were: Mouse-GFP  
471 (SIGMA-ALDRICH, G6539. 1:500 dilution), Rabbit-TH (EMD-Millipore, AB152, 1:200 dilution), and Rat-  
472 DN-cadherin (Hybridoma Bank DSHB, DNEX#8, 1:50 dilution). This was followed by 4 washes for 20 min  
473 each in PAT, and incubation overnight on a nutator at 4 °C with secondary antibodies diluted in blocking  
474 buffer. The secondary antibodies were all from Molecular Probe and used at 1:500 dilution: Alexa Fluor 488  
475 anti-Mouse (A11029), Alexa Fluor 568 anti-Rabbit (A11036) and Alexa Fluor 633 anti-Rat (A21094).  
476 Brains were then washed 4 times for 20 min each in PAT at room temperature, 1 time for 20 min in 1X PBS  
477 and mounted with VECTASHIELD mounting medium (Vector Laboratories, H-1000). Samples were imaged  
478 on a Zeiss 800 confocal laser-scanning microscope.

479

## Social epigenetic effects in dopaminergic neurons

480 **mini-INTACT:** Nuclei were obtained from dopaminergic neurons using INTACT (Henry et al., 2012) with  
481 modifications to enable purification of nuclei from as few as 200-250 heads per ChIP-seq for *TH-GAL4*  
482 which is expressed in ~120 neurons/brain. *Drosophila* males of *3X-UAS-unc84-2XGFP/TH-GAL4* genotype  
483 were either socially isolated or group housed and flash frozen during the morning activity peak. Frozen heads  
484 were collected over dry ice-cooled sieves from vortex-decapitated flies and added to 5 ml of mini-INTACT  
485 buffer consisting of 5mM  $\beta$ -glycerophosphate pH 7.0, 2 mM MgCl<sub>2</sub>, 1x complete protease inhibitor cocktail  
486 (Roche: 11873580001), 5 mM sodium butyrate, 0.6 mM spermidine, 0.2 mM spermine, 0.5% NP-40 and  
487 0.6mM  $\beta$ -mercaptoethanol. The suspension was passed over a continuous flow homogenizer, set at 1000  
488 rpm, ten to twelve times. The homogenizer was modified such that the grooves at the bottom of the  
489 homogenizer helped push fly heads upward increasing efficiency of homogenization and preventing sample  
490 loss (Figure 1- Figure Supplement 1). Homogenate was filtered through a 20  $\mu$ m filter (Partec CellTrics,  
491 Sysmex: 25004-0042-2315) and then a 10  $\mu$ m filter (Partec CellTrics, Sysmex: 04-0042-2314). 1  $\mu$ g of anti-  
492 GFP antibody (Invitrogen: G10362) was added to the filtered homogenate, tubes were gently inverted 10  
493 times, and incubated on ice for 20 minutes to allow binding. To this mix, 30  $\mu$ l of Dynabeads Protein-G  
494 (Invitrogen: 100-03D) were added and incubated at 4°C for 30 min with constant end-over-end rotation.  
495 Beads were then collected on a magnet (Diagenode: B04000003) and washed thrice using INTACT buffer.  
496 Bead-bound nuclei were resuspended in 1 ml INTACT buffer and formaldehyde fixed for ChIP-seq as  
497 described in the next section.

498

499 **ChIP-Seq:** For each ChIP-seq reaction ~10,000-15,000 mini-INTACT isolated bead-bound nuclei were  
500 processed using Low Cell # ChIP kit (Diagenode: C01010070) as per manufacturer's instructions. In brief,  
501 nuclei were fixed in 1% formaldehyde for 2 minutes, immediately quenched with Glycine and then lysed  
502 using nuclear lysis buffer with protease inhibitor cocktail at room temperature for 5 minutes. PBS was added

## Social epigenetic effects in dopaminergic neurons

503 to dilute the lysate-bead mix and loaded in AFA tubes (Covaris Inc.: 520045) for sonication. Ultra-sonicator  
504 (Covaris Inc.: E220) was used to sheer chromatin to ~200 bp length and chromatin was recovered from the  
505 supernatant after magnetic separation. ChIP was performed using the following ChIP-seq grade antibodies:  
506 H3K4me3 (Diagenode: C15410003-50), H3K9me3 (Diagenode: C15410193), H3K9/K14ac (Diagenode:  
507 C15410200), H3K27me3 (Diagenode: C15410195), H3K27ac (Diagenode: C154410196) and H3K36me3  
508 (Diagenode: C15410192) . Two biological replicates were performed for each histone mark and input DNA  
509 was used as the control. Libraries for sequencing were prepared using MicroPlex Library Preparation kit  
510 (Diagenode: C05010012) as per manufacturer's instruction. Single end 60 bp sequencing reads were obtained  
511 using Illumina Hi-seq 2500.

512

513 **RNA-seq:** We isolated cell bodies of dopaminergic neurons using Fluorescence Activated Cell Sorting  
514 (FACS) during the flies' morning activity peak. The protocol was essentially as described (Hempel et al.,  
515 2007) with minor modifications. In brief, brains were dissected from socially-isolated or group-housed flies  
516 expressing membrane-tagged GFP and nuclear tdTomato in their dopaminergic neurons. The flies were  
517 obtained by crossing flies carrying *TH-GAL4* with a stock carrying *pJFRC105-10XUAS-IVS-nlstdTomato* in  
518 VK40 (gift of Barret D. Pfeiffer, Rubin Lab, Janelia Research Campus) and *pJFRC29-10XUAS-IVS-*  
519 *myr::GFP-p10* in AttP40 (Pfeiffer et al., 2012) and was found to produce better purity in FACS than other  
520 reporters (Etheredge et al., 2018). To account for possible manual bias, dissectors switched their handling of  
521 group- or single-housed flies in each session. Dissected brains were digested using Liberase DH (Roche:  
522 5401054001), manually triturated using glass pipettes, and filtered using a Falcon 35  $\mu$ m cell strainer  
523 (Corning: 352235) before sorting. Approximately 1500 dopaminergic neurons were obtained from  
524 approximately 30 brains using a BD FACSAria II sorter (BD Biosciences, USA). Total RNA was extracted  
525 using the Arctus, PicoPure RNA Isolation Kit (Thermo Fisher Scientific: 12204-01), ERCC spike-in controls  
526 were added and cDNA libraries from this material were prepared using Ovation RNA-seq System V2 (Nugen:



## Social epigenetic effects in dopaminergic neurons

527 7102) as per manufacturer's instructions. Three biological replicates were performed for each condition.

528 Paired end 100 bp sequencing reads were obtained using Illumina Hi-seq 2500.

529

530 **Sleep assay:** Flies that were previously socially isolated or group housed for 4 days were anesthetized briefly  
531 with carbon dioxide and transferred into 5 mm × 65 mm transparent plastic tubes with standard cornmeal  
532 dextrose agar media. For recording locomotor activity, *Drosophila* activity monitors (Trikinetics, Waltham,  
533 USA) were kept in incubators at 25°C with 65% relative humidity in a 12/12 h light/dark cycle. Flies were  
534 allowed one night to acclimatize to the apparatus and activity data was collected in 1 minute bins for the  
535 following 24 hours as described (Donelson et al., 2012). One sleep bout was defined as 5 minutes of  
536 continuous inactivity (Hendricks et al., 2000; Shaw et al., 2000). Statistical analysis of the sleep data was  
537 performed using Prism 7 (GraphPad software) and R scripts (R Core Team, 2014).

538

## 539 **Bioinformatics**

540 **Sequencing analysis:** All genomic procedures used release 6.02 of the *Drosophila melanogaster* genome  
541 (Dos Santos et al., 2015). R 3.0.3 was used in scripts and statistics (R Core Team, 2014). Non-parametric  
542 statistical tests were used except where noted. STAR (Dobin et al., 2013) was used for alignment of RNA-  
543 seq data. Total counts of de-duplicated reads were calculated at each genome position using Rsubread (Liao  
544 et al., 2013), followed by differential expression calls using edgeR (Robinson et al., 2010). We cross-checked  
545 differential expression using the CyberT (Kayala and Baldi, 2012) and FCROS (Dembélé and Kastner, 2014)  
546 packages. Normalization between replicates and treatments was performed using default methods (TMM) in  
547 edgeR to correct for coverage levels. CuffDiff (Trapnell et al., 2012) was used to detect changes in splicing.  
548 Bowtie (Langmead, 2010) was used to align ChIP-seq reads, and DiffReps (Shen et al., 2013) and ngs.plot  
549 (Shen et al., 2014) were used to quantify ChIP-seq reads. Changes to DiffReps and ngs.plot databases and



## Social epigenetic effects in dopaminergic neurons

550 code were required to use *Drosophila* genome release 6.02 and are included in Supplement Data 5. SICER  
551 (Xu et al., 2014a; Zang et al., 2009) was also run to cross-check DiffReps results (Supplement Table 6).  
552  
553 **Clustering:** Gene Ontology (GO) analysis was done using two web tools: DAVID (Huang et al., 2009) and  
554 GOrilla (Eden et al., 2009). For mRNA differential expression analysis, genes in the top 40% of expression  
555 level were used as the background lists for both tools, and genes with FCROS significant differential  
556 expression (FDR=0.2) were analyzed. For analysis of clusters (see below) genes belonging to each cluster  
557 were compared to the appropriate background list (top 40% genes for 8-clusters). K-means clustering  
558 (Hartigan and Wong, 1979) was done using the kmeans package in R. To understand the impact of social  
559 isolation on epigenetics of genes expressed in dopaminergic neurons, a dataset of the top 40% of genes by  
560 mRNA TPM expression (5,372 genes) was constructed containing normalized differences between group-  
561 housed and isolated flies for mRNA and for the 6 epigenetic marks. Tests using an information criterion  
562 approach (BIC) were used to determine the optimal numbers of clusters, which was k=8 for the 5,372-gene  
563 dataset. K-means clustering is a stochastic process that may yield very different results each time it is run if  
564 there is no strong pattern in the data. To determine robustness of the gene assignments to clusters, we re-ran  
565 clustering with random seed changes to create N cluster assignments. We then compared each cluster  
566 assignment to every other ( $1035 = N*(N-1)/2$  comparisons for 8-cluster assignments). In each comparison,  
567 we calculated the percent overlap of a cluster in assignment i with clusters in assignment j, and reported the  
568 maximum percent overlap for that cluster. We therefore generated  $8,280=8*1,035$  comparisons. Figure 3-  
569 Figure Supplement 1 shows a histogram of cluster overlap percentages. For eight clusters, the median percent  
570 overlap of a cluster in one assignment to its best match in a second assignment was 94%, and was >99%,  
571 72% of the time. Thus, we concluded that cluster identity is fairly stable, in spite of the randomness inherent  
572 in the k-means algorithm.

## Social epigenetic effects in dopaminergic neurons

573 Cluster functional enrichment was determined using the DAVID 6.8 functional annotation tool  
574 (Huang et al., 2009) using biological, cellular, and molecular function levels 5 plus chromosome location,  
575 and using functional annotation clustering. For the gene clusters the GO analysis by DAVID used the 5,372  
576 highest expression genes as background. Results are reported using thresholds for individual categories FDR  
577 < 0.05 and enrichment value >2.0 for functional clusters.

578

579 **Motif analysis:** We used the MEME suite of tools (Bailey et al., 2009) to find putative transcription factor  
580 binding sites in promoters of the 8 gene clusters found by k-means. Centrimo 4.12.0 (Bailey and Machanick,  
581 2012) was used with promoter-proximal ( $\pm 500$  bp from TSS) sequences of genes. We used databases of TF  
582 binding motifs from Fly Factor Survey 2014 (Enameh et al., 2013; Zhu et al., 2011) supplemented by motifs  
583 determined in a recent study (Nitta et al., 2015). Promoter proximal sequences of each gene in a cluster (“test  
584 genes”) were tested for motif enrichment using Centrimo compared to a control set of sequences from an  
585 equal number of randomly selected genes not in the cluster (“control genes”). We report a motif as “enriched”  
586 if the Centrimo’s adjusted p-value was  $< 1 \times 10^{-10}$ .

587 To quantify the number of potential binding sites of each enriched motif in each gene, we used FIMO version  
588 4 (Grant et al., 2011) with default parameters. Log fold changes in mRNA levels between group housed and  
589 single housed treatments were the dependent variable in multilinear regressions in which numbers of each  
590 enriched TF motifs were used as dependent variables. The “lm” program from R was used; non-significant  
591 dependent variables were removed in a step-wise manner using “stepAIC” (least significant first) until only  
592 significant variables remained; the results of these regressions are reported with multilinear r (square root of  
593 proportion of variance explained by the regression) and F-test p-value. Full tables of regression fits are  
594 provided in Supplement Data 3.

595

596 **Acknowledgements**

## Social epigenetic effects in dopaminergic neurons

597 We thank Lee Henry Gilbert for help with INTACT protocol and fly stocks, Janelia Cell Culture facility for  
598 help with FACS, Igor Negrashov and Janelia Experimental Technology for help designing the homogenizer,  
599 Serge Picard and Janelia Quantitative Genomics for sequencing and Andrew Lemire for helpful discussions.  
600 We thank Barret Pfeiffer, Gerald Rubin and Jack Etheredge for fly stocks used in FACS. We would also like  
601 to thank Loren Looger and members of Heberlein lab for helpful discussions and Mark Cembrowski and  
602 Vilas Menon for comments on the manuscript. This work was supported by the Howard Hughes Medical  
603 Institute.

604

## 605 **Competing Interests**

606 The authors declare no competing interests exists.

607

## 608 **Tables and Figures with legends**

609

|              | H3K27ac | H3K9ac_K14ac | H3K36me3 | H3K9me3 | H3K27me3 | mRNA  |
|--------------|---------|--------------|----------|---------|----------|-------|
| H3K4me3      | 0.76    | 0.84         | 0.73     | -0.46   | -0.55    | 0.54  |
| H3K27ac      |         | 0.85         | 0.62     | -0.29   | -0.34    | 0.41  |
| H3K9ac_K14ac |         |              | 0.61     | -0.25   | -0.33    | 0.47  |
| H3K36me3     |         |              |          | -0.35   | -0.42    | 0.38  |
| H3K9me3      |         |              |          |         | 0.90     | -0.32 |
| H3K27me3     |         |              |          |         |          | -0.38 |

610

611 **Table 1:** Pearson correlation coefficient values of pairwise comparisons among ChIP-seq for six histone modification  
612 marks and gene expression. Activating epigenetic marks and positive correlations are shown in green, repressive marks  
613 and negative correlation are shown in red.

614

Social epigenetic effects in dopaminergic neurons

615

|       | <i>Sleep-related genes</i> | <i>Neuropeptides and receptor genes</i> | <i>Male mating genes</i> | <i>G-protein signaling genes</i> | <i>Ligand-gated ion channel genes</i> | <i>Catecholamine metabolism genes</i> | <i>MAPK signaling genes</i> | <i>Epigenetic activation genes</i> | <i>Epigenetic repression genes</i> |
|-------|----------------------------|-----------------------------------------|--------------------------|----------------------------------|---------------------------------------|---------------------------------------|-----------------------------|------------------------------------|------------------------------------|
| Group | 1                          | 2                                       | 3                        | 4                                | 5                                     | 6                                     | 7                           | 8                                  | 9                                  |
| r     | 0.31                       | 0.25                                    | 0.53                     | 0.34                             | 0.39                                  | 0.72                                  | 0.30                        | 0.79                               | 0.86                               |
| p     | 0.01                       | 0.05                                    | 0.001                    | 0.001                            | 0.03                                  | 0.03                                  | .005                        | 0.007                              | 0.006                              |
| Hr38  |                            | -                                       | -                        | (-)                              | -                                     |                                       | -                           | -                                  |                                    |
| Cbt   | -                          |                                         | -                        |                                  |                                       |                                       |                             |                                    | +                                  |
| CrebA |                            |                                         |                          | -                                |                                       |                                       |                             |                                    |                                    |
| Sr    | +                          |                                         |                          |                                  |                                       | -                                     |                             |                                    |                                    |
| Pho   |                            |                                         |                          |                                  |                                       |                                       | +                           | +                                  | +                                  |

616

617 **Table 2:** mRNA changes between GH and SH males are predicted by changes in epigenetic marks and presence of  
 618 some TF binding sites. The ability to predict is given by the coefficient of multiple correlation  $r$ , and the  $p$ -value from  
 619 an F-test. Full statistics are given in Supplement Data 3. The sign of the partial correlation coefficient is given as +, -,  
 620 or blank for non-significant values. (-) indicates the coefficient was marginally significant.

## Social epigenetic effects in dopaminergic neurons

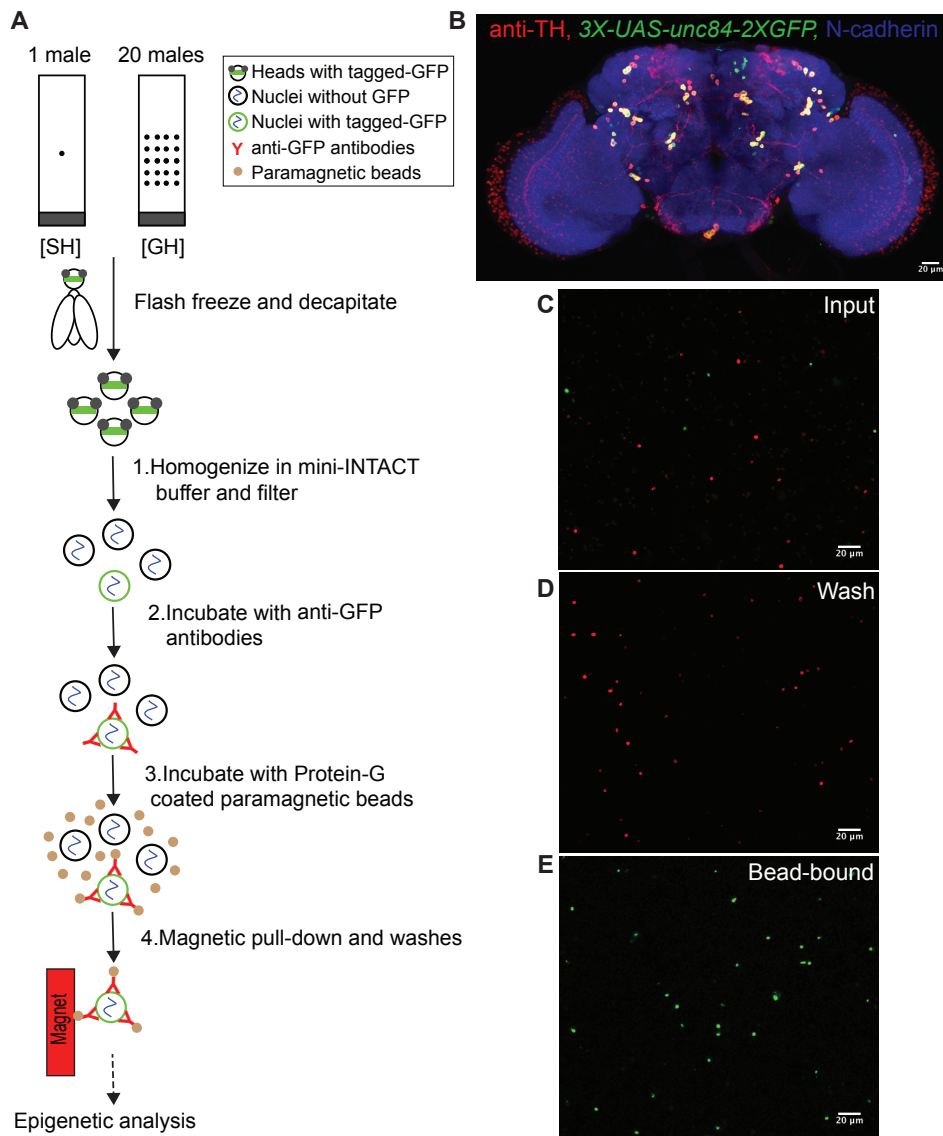

621

622 **Figure 1: mini-INTACT method affinity purifies cell-type specific nuclei for epigenetic analysis in *Drosophila*.**

623 (A) Schematic of mini-INTACT method to affinity purify dopaminergic neurons from heads of *Drosophila* male flies

624 after four days of social isolation or social enrichment. (B) Expression of SUN-tagged GFP (*3XUAS-unc84-2XGFP*)

625 in dopaminergic neurons driven by *TH-GAL4* in an adult male brain. (C) To assess the purity of dopaminergic nuclei,

626 nuclei were obtained from a mixture of heads derived from flies expressing *10XUAS-unc84-tdTomfl* under the control

627 of the pan-neuronal *elav-GAL4* driver (red) and flies expressing *3XUAS-unc84-2XGFP* under the control of the *TH-*

628 *GAL4* driver (green). (D) After capturing green nuclei using bead-bound anti-GFP antibodies, red nuclei were washed

629 away. (E) Bead-bound green nuclei were almost devoid of contaminating red nuclei.

## Social epigenetic effects in dopaminergic neurons

630

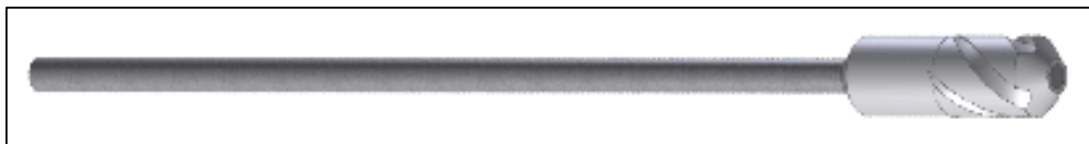

631

632 **Figure 1- Figure Supplement 1: Design of homogenizer used in mini-INTACT**

633

634

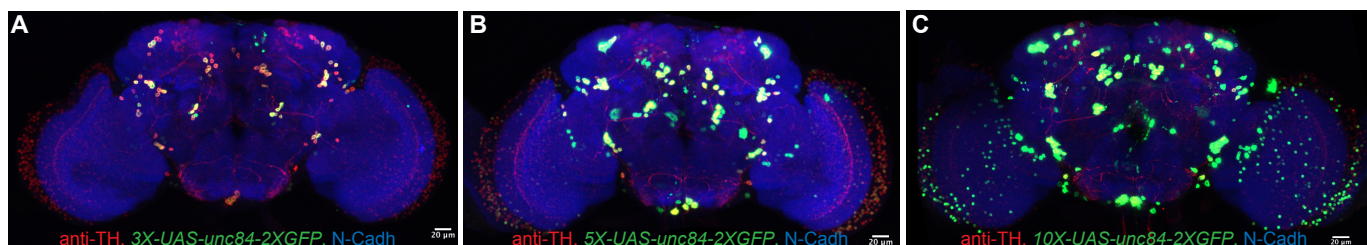

635

636

637 **Figure 1- Figure Supplement 2: Comparison of tagged GFP expression in adult *Drosophila* brain.**

638 The INTACT transgene (*unc84-2XGFP*) was driven in dopaminergic neurons (*TH-GAL4*) using different copy

639 numbers of the UAS promoter and expression of GFP was compared using the same imaging settings. (A) *3X-UAS-*

640 (*B*) *5X-UAS-* and (*C*) *10X-UAS-unc84-2XGFP*. The *3X-UAS-unc84-2XGFP* transgene most faithfully reproduced *TH-*

641 *GAL4* expression, while ectopic expression was observed upon further increases of the *UAS* copy numbers.

642 Dopaminergic neurons were stained with anti-TH antibodies (red), INTACT transgene expression using anti-GFP

643 antibodies (green), and N-cadherin (blue) was used as reference. See Figure 1B for *3X-UAS-unc84-2XGFP* brain

644 imaged at higher intensity. Scale bar is 20 μm.

## Social epigenetic effects in dopaminergic neurons

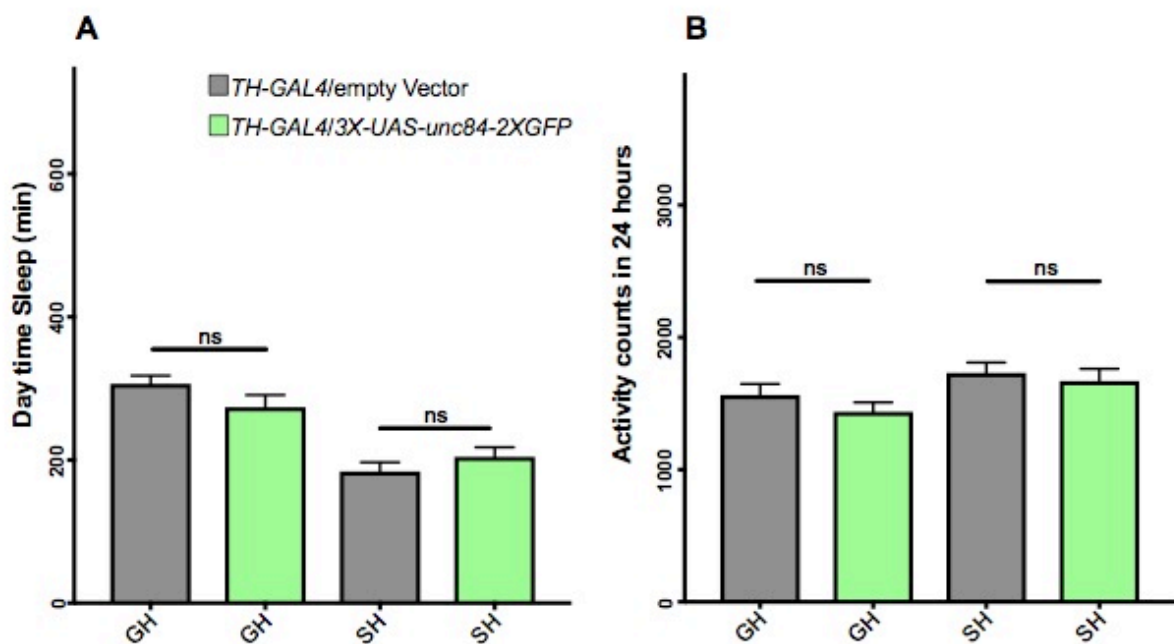

644

645 **Figure 1- Figure Supplement 3: *3XUAS-unc84-2XGFP* expression in dopaminergic neurons did not affect**  
646 **daytime sleep or activity over 24 hours.**

647 (A) Daytime sleep measured over a 12 hours period. GH males sleep more than SH males during the daytime. No  
648 significant difference was observed due to tagged-GFP expression. (B) Total number of activity counts (beam breaks)  
649 over 24 hours. GH are less active than SH flies as expected. No significant difference was observed due to tagged-GFP  
650 expression. N = 31-32. Unpaired t-test.

651

| Replicate | Green nuclei numbers | Red Nuclei numbers | Purity |
|-----------|----------------------|--------------------|--------|
| 1         | 482                  | 8                  | 98.3%  |
| 2         | 502                  | 12                 | 97.6%  |
| 3         | 698                  | 12                 | 98.2%  |

652

653

654 **Figure 1- Figure Supplement 4: Purity assessment of dopaminergic nuclei.**

655 The table shows the number of captured green dopaminergic nuclei using bead-bound anti-GFP antibodies. Most of  
656 the contaminating red nuclei were washed away from bead-bound affinity-purified nuclei. See Figure 1 and main text  
657 for details (3 biological replicates).



## Social epigenetic effects in dopaminergic neurons

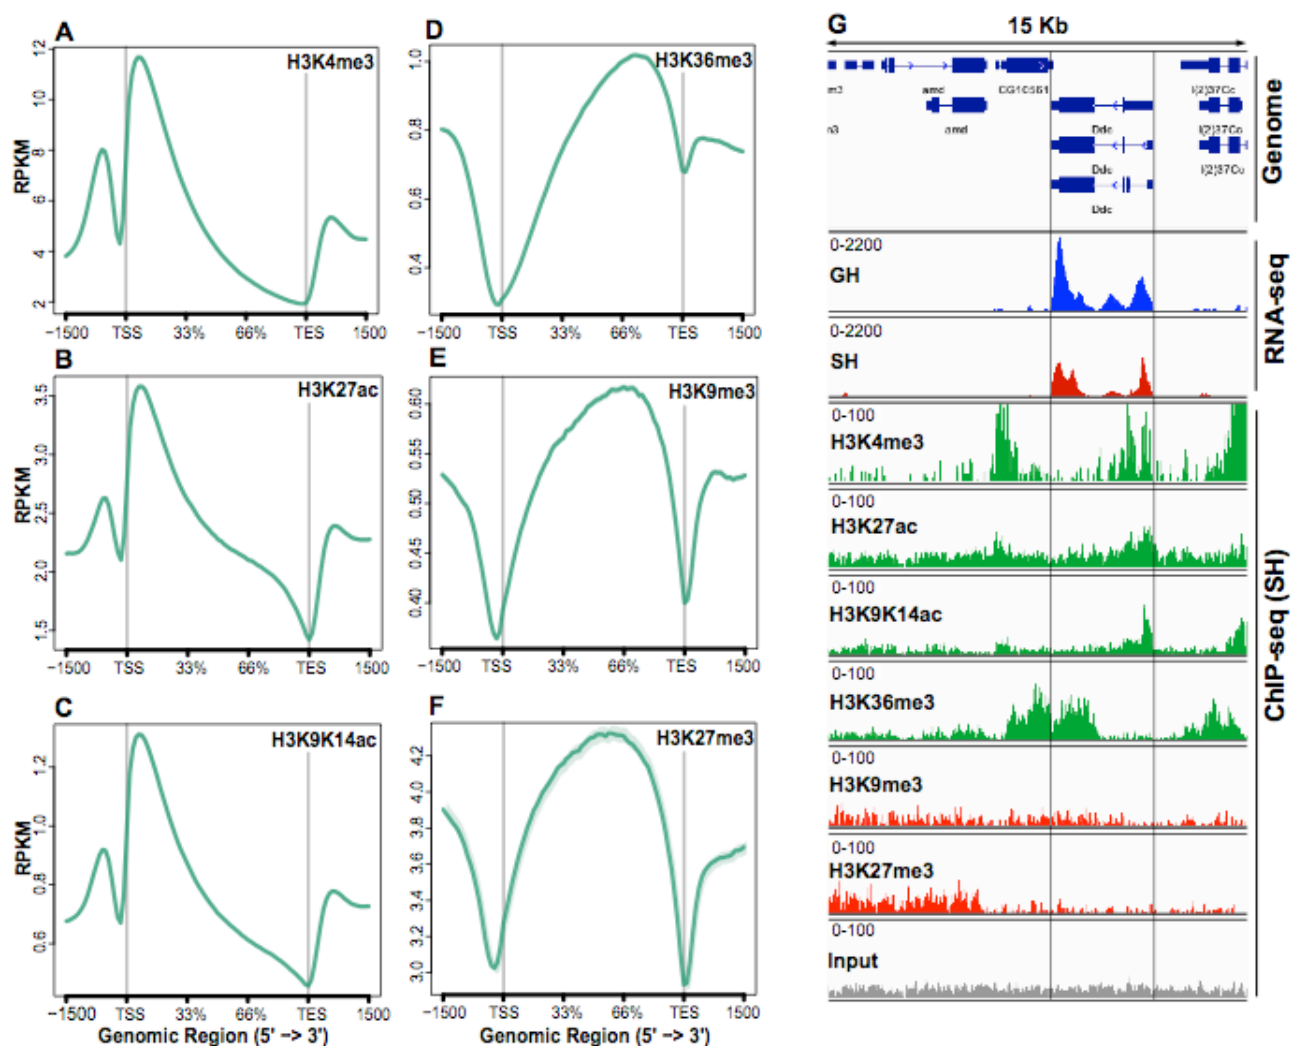

658

659 **Figure 2: Epigenome of mini-INTACT purified dopaminergic neurons measured by ChIP-seq and RNA-seq.**

660 (A-F) Genome-wide profiles of the levels for the six epigenetic marks shown as ngs.plot displays. (A-C) Activating

661 marks were concentrated in the promoter and immediately downstream of the TSS. (D) H3K36me3, a mark associated

662 with transcriptional elongation, was enriched in the gene body and skewed towards the TES. (E-F) Two repressive

663 marks were depleted from the TSS and TES, concentrated in the gene body, and enriched upstream of the promoter

664 region. (G) Epigenetic and transcriptional enrichment profiles surrounding the *Ddc* gene. The RNA-seq panels show

665 that *Ddc* is more strongly expressed in GH (blue) than in SH (red) males. The distribution of epigenetic marks shown

666 are representative of the SH dataset. The four activating marks (green panels) were high in this strongly expressed

667 gene, while the two repressive marks (red) showed low levels. An example of single “input” DNA track, which is used

668 as a control for mark levels, is shown in the final panel.



## Social epigenetic effects in dopaminergic neurons

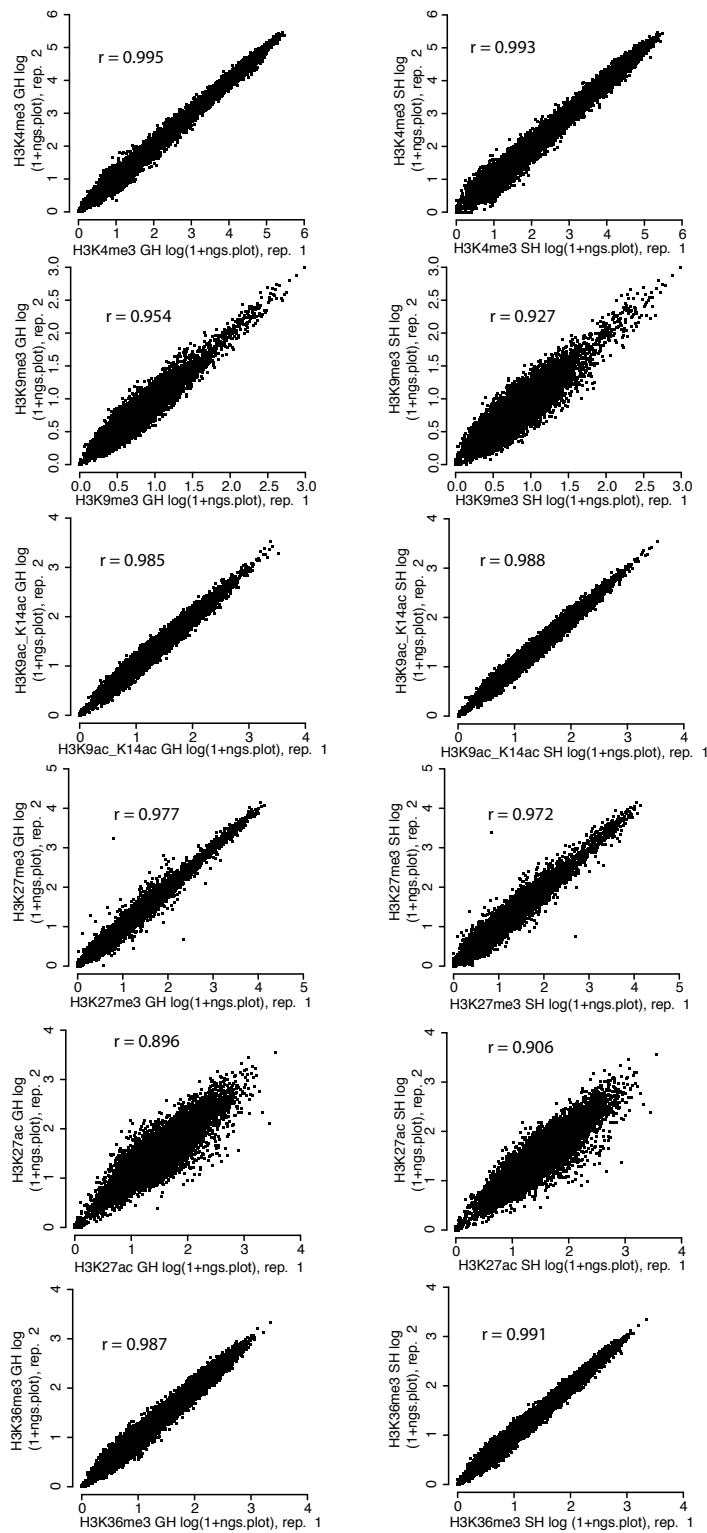

669  
670

671 **Figure 2 - Figure Supplement 1: Replicate concordance for ChIP-seq for various histone modifications.** ChIP-  
672 seq replicate concordance is shown with Pearson's correlation coefficient (r- values) calculated on Log (1+ngs.plot)  
673 enrichment values for all six histone marks.

## Social epigenetic effects in dopaminergic neurons

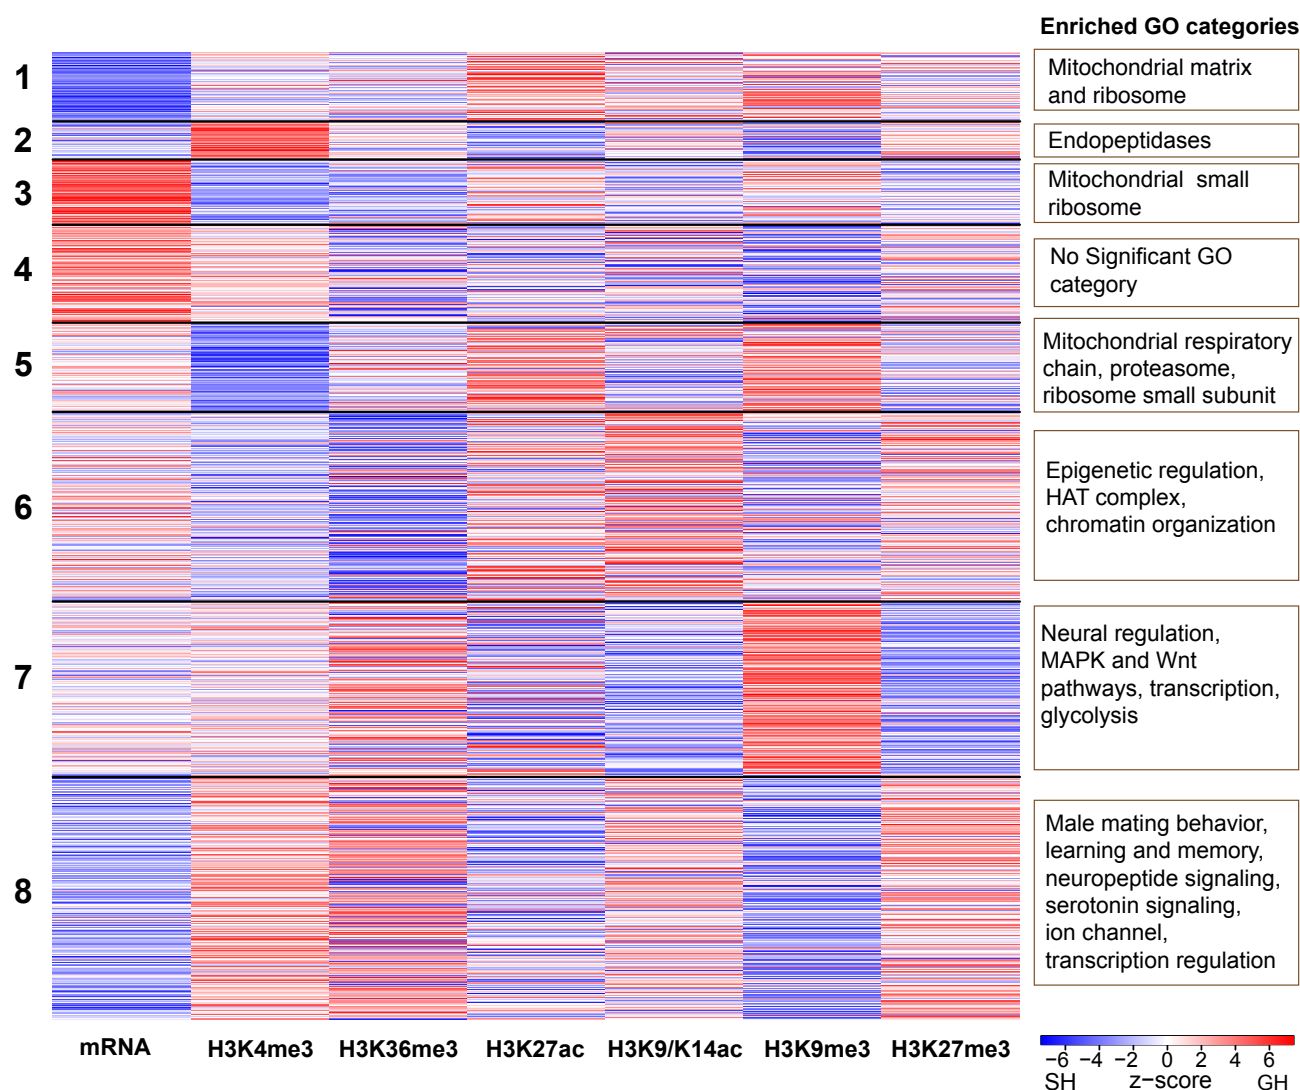

674

675 **Figure 3: Epigenetic landscape of genes expressed in dopaminergic neurons is modulated by social experience.**

676 Heat map of eight groups identified by k-means clustering of the change in mark and mRNA levels between GH and

677 SH males. Red lines show genes whose marks or mRNA was higher in GH than SH males, blue lines show those that

678 were higher in SH than GH males. Some clusters are enriched for genes with neural and regulatory functions, especially

679 clusters 6-8. Enriched GO categories from each cluster are shown on the right.

680

681

682

## Social epigenetic effects in dopaminergic neurons

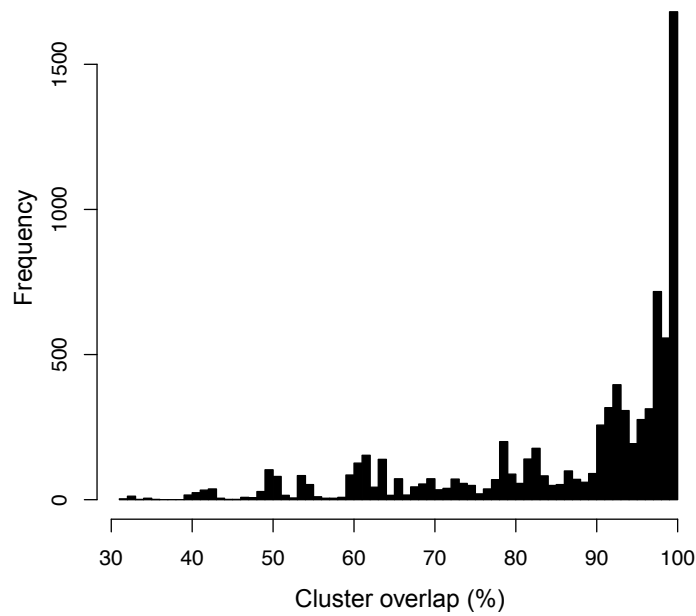

683

684 **Figure 3- Figure Supplement 1: k-means cluster overlap.**

685 The figure shows a histogram of k-means cluster overlap percentages used to calculate robustness of gene assignments  
686 to clusters. For eight clusters, the median percent overlap of a cluster in one assignment to its best match in a second  
687 assignment was 94%, and was greater than 99% 72% of the time (see Methods for details).

688

689

## Social epigenetic effects in dopaminergic neurons

690

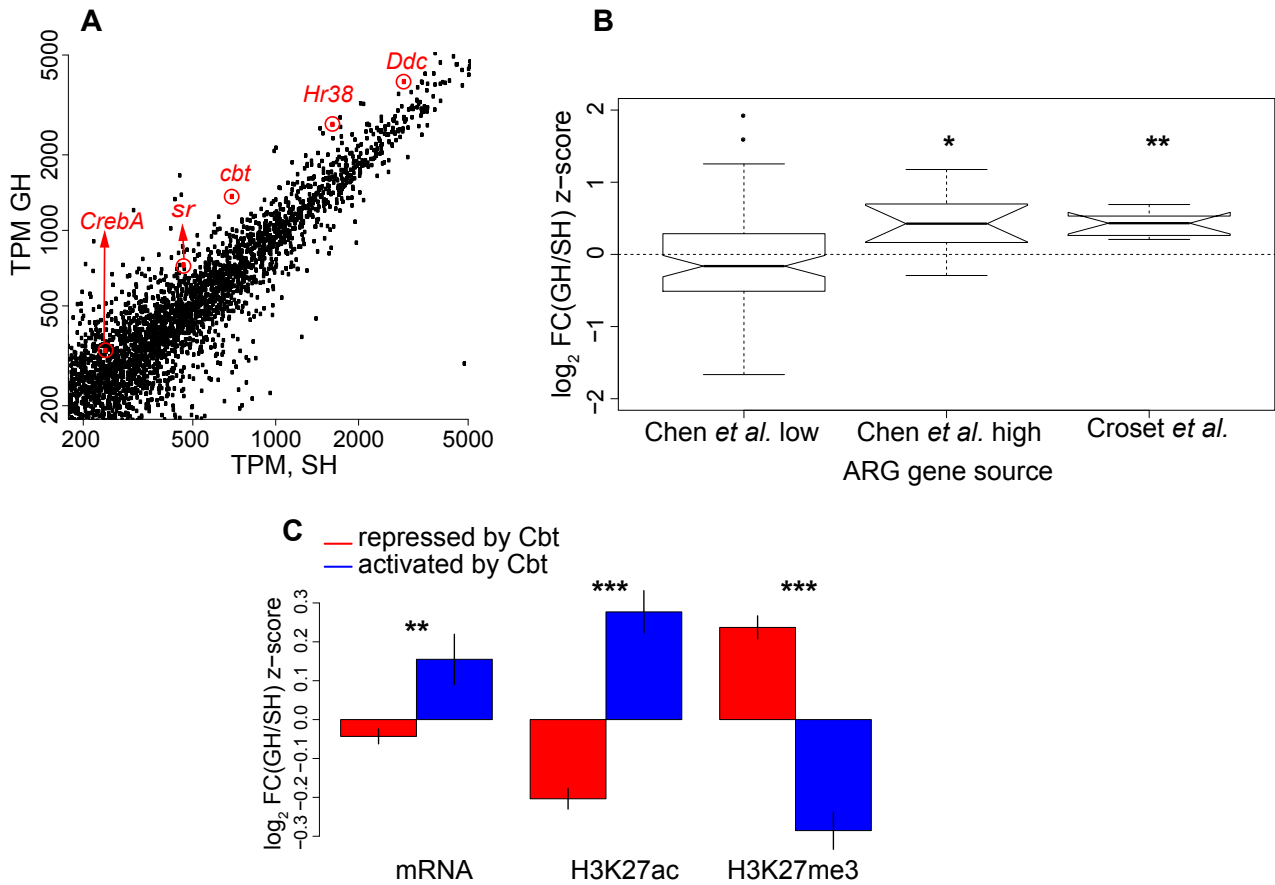

691

692

693

**Figure 4: Activity-regulated genes (ARGs) are upregulated in dopaminergic neurons of GH males and**

694

**correlate with transcriptional repression.**

695

(A) A zoomed in scatter plot of GH versus SH mRNA values. *Ddc* (Figure 2) and four ARG-TFs are highlighted. (B)

696

Box plots of mRNA log fold change z-scores (GH is positive, SH is negative) for groups of ARGs from two different

697

studies. Genes with log fold change lower than 1.5 in Chen *et al.* 2016 study are not over-represented in GH flies (Chen

698

*et al.* low). Whereas, the last two groups are significantly over-represented in GH flies. (C) Genes repressed (red) or

699

activated (blue) by the ARG-TF Cbt (from Bartok *et al.*, 2015) are shown on the same z-score scale as in (B). Genes

700

repressed by Cbt have significantly lower mRNA and activating mark H3K27ac, and significantly higher repressive

701

mark H3K27me3. Genes activated by Cbt show the reverse pattern.

702

## Social epigenetic effects in dopaminergic neurons

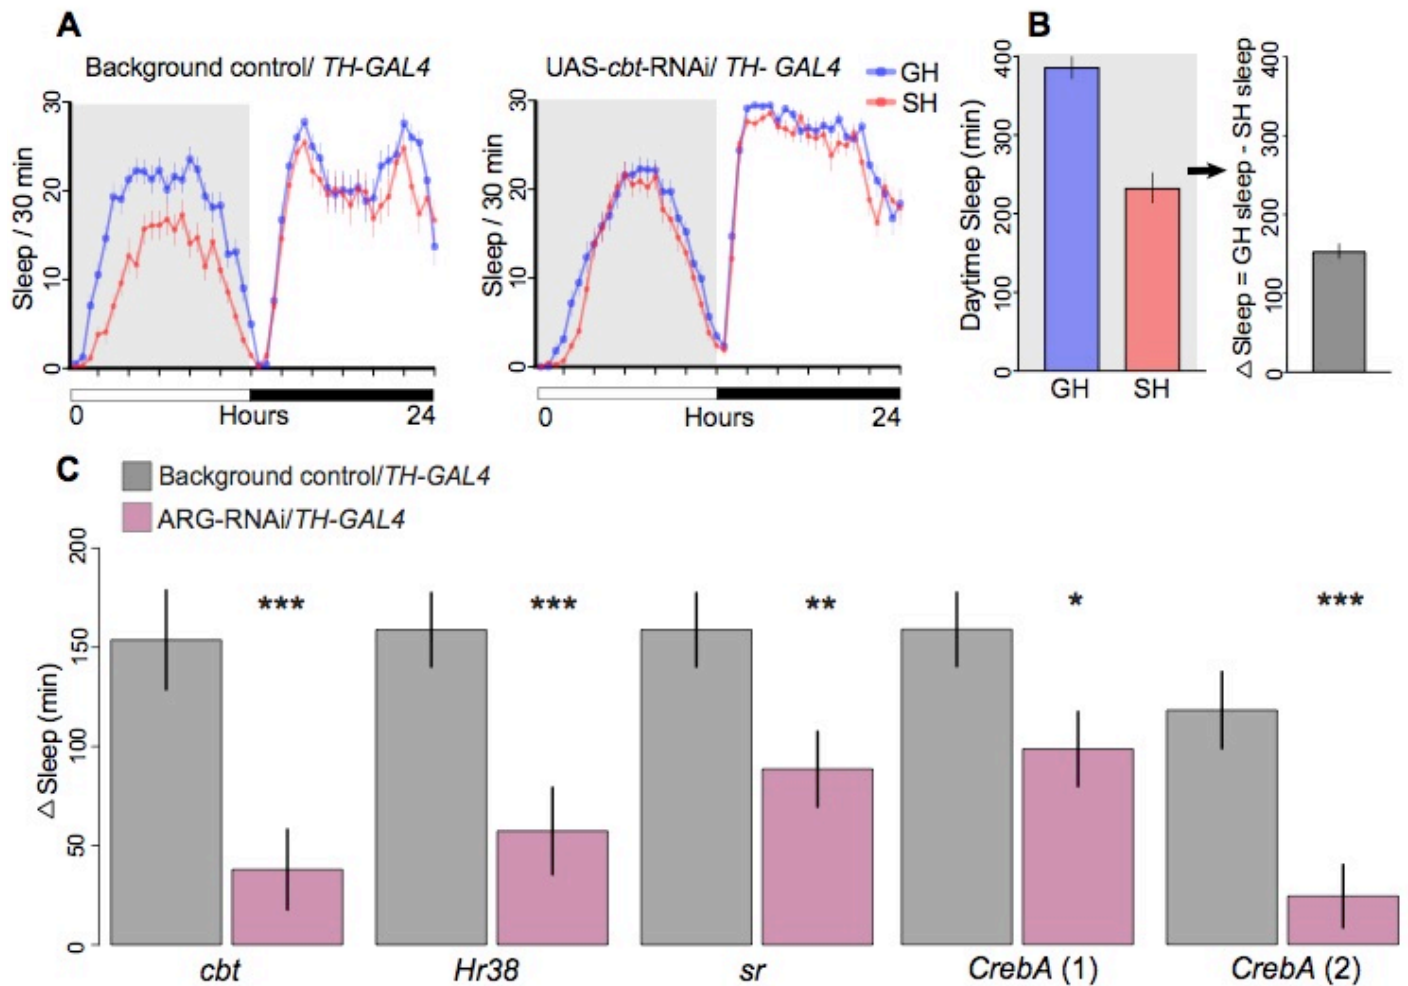

703

704 **Figure 5: Knockdown of ARGs by RNAi affected social effects on daytime sleep.**

705 Knock-down of ARGs in dopaminergic neurons was achieved by driving RNAi transgenes with *TH-GAL4*; controls  
706 carried empty vectors without RNAi hairpin and *TH-GAL4*. (A) Example graph of sleep per 30 minutes over 24 hours.  
707 Control single housed (SH) flies sleep less than group housed (GH) flies during the day (shaded grey area). Expressing  
708 RNAi for ARG-TF *cabut* in dopaminergic neurons significantly reduced this difference. (B) Daytime sleep was  
709 measured and  $\Delta$ Sleep was compared between experimental males carrying the RNAi transgene and controls.  $\Delta$ Sleep  
710 is defined as minutes of daytime sleep for GH flies minus the same measure for SH flies (as described by Ganguly *et*  
711 *al.* 2006). (C)  $\Delta$ Sleep for controls and RNAi knockdowns. Error bars are mean $\pm$ SEM. In every case, RNAi knockdown  
712 significantly reduced the social effect on  $\Delta$ sleep. Two different RNAi lines were tested for *CrebA*, each showing  
713 significant reductions.

## Social epigenetic effects in dopaminergic neurons

714

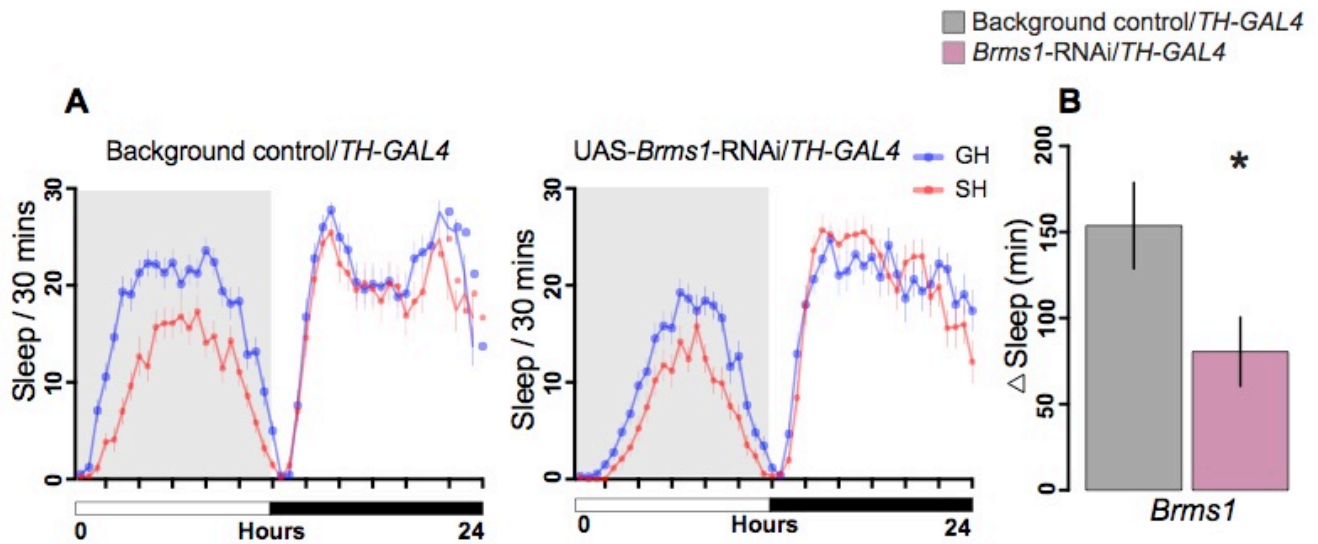

715

716 **Figure 5 - Figure Supplement 1: Knockdown of epigenetic eraser *Brms1* by RNAi reduced social effects on**  
717 **daytime sleep.**

718 *Brms1* is a member of *Sin3A* histone deacetylase complex. Knockdown of *Brms1* in dopaminergic neurons was  
719 achieved by driving an RNAi transgene with *TH-GAL4*; controls carried empty vectors without RNAi hairpin and *TH-*  
720 *GAL4*. (A) Sleep per 30 minutes over 24 hours for control and *Brms1* knockdown in SH and GH flies. Daytime sleep  
721 is highlighted in shaded grey area for both genotypes. (B) Expressing RNAi for *Brms1* in dopaminergic neurons  
722 reduced the social effect of sleep during the day ( $\Delta$ Sleep). Error bars are mean  $\pm$ SEM.

723

724

725

726

727

728

Social epigenetic effects in dopaminergic neurons

729 **References**

- 730 **Abdelmoez, M. N., Iida, K., Oguchi, Y., Nishikii, H., Yokokawa, R., Kotera, H., Uemura, S.,**  
731 **Santiago, J. G. and Shintaku, H.** (2018). SINC-Seq: Correlation of gene expressions between nucleus  
732 and cytoplasm reflects single-cell physiology. *Genome Biol.* **19**, 1–11.
- 733 **Abruzzi, K. C., Zadina, A., Luo, W., Wiyanto, E., Rahman, R., Guo, F., Shafer, O. and Rosbash, M.**  
734 (2017). RNA-seq analysis of *Drosophila* clock and non-clock neurons reveals neuron-specific cycling  
735 and novel candidate neuropeptides. *PLoS Genet.* **13**, 1–23.
- 736 **Alekseyenko, O. V, Chan, Y.-B., Li, R. and Kravitz, E. A.** (2013). Single dopaminergic neurons that  
737 modulate aggression in *Drosophila*. *Proc. Natl. Acad. Sci. U. S. A.* **110**, 6151–6.
- 738 **Amin, N. M., Greco, T. M., Kuchenbrod, L. M., Rigney, M. M., Chung, M.-I., Wallingford, J. B.,**  
739 **Cristea, I. M. and Conlon, F. L.** (2014). Proteomic profiling of cardiac tissue by isolation of nuclei  
740 tagged in specific cell types (INTACT). *Development* **141**, 962–973.
- 741 **Anreiter, I., Kramer, J. M. and Sokolowski, M. B.** (2017). Epigenetic mechanisms modulate differences  
742 in *Drosophila* foraging behavior. *Proc. Natl. Acad. Sci. U.S.A.* **114**, 12518–12523.
- 743 **Anreiter, I., Biergans, S. D. and Sokolowski, M. B.** (2019). Epigenetic regulation of behavior in  
744 *Drosophila melanogaster*. *Curr. Opin. Behav. Sci.* **25**, 44–50.
- 745 **Azanchi, R., Kaun, K. R. and Heberlein, U.** (2013). Competing dopamine neurons drive oviposition  
746 choice for ethanol in *Drosophila*. *Proc. Natl. Acad. Sci.* **110**, 21153–21158.
- 747 **Bailey, T. L. and Machanick, P.** (2012). Inferring direct DNA binding from ChIP-seq. *Nucleic Acids Res.*  
748 **40**, e128.
- 749 **Bailey, T. L., Boden, M., Buske, F. A., Frith, M., Grant, C. E., Clementi, L., Ren, J., Li, W. W. and**  
750 **Noble, W. S.** (2009). MEME Suite: Tools for motif discovery and searching. *Nucleic Acids Res.* **37**,  
751 202–208.

Social epigenetic effects in dopaminergic neurons

- 752 **Bainton, R. J., Tsai, L. T., Singh, C. M., Moore, M. S., Neckameyer, W. S. and Heberlein, U. (2000).**  
753 Dopamine modulates acute responses to cocaine, nicotine and ethanol in *Drosophila*. *Curr. Biol.* **10**,  
754 187–94.
- 755 **Barski, A., Cuddapah, S., Cui, K., Roh, T. Y., Schones, D. E., Wang, Z., Wei, G., Chepelev, I. and**  
756 **Zhao, K. (2007).** High-Resolution Profiling of Histone Methylations in the Human Genome. *Cell* **129**,  
757 823–837.
- 758 **Bartok, O., Teesalu, M., Ashwall-Fluss, R., Pandey, V., Hanan, M., Rovenko, B. M., Poukkula, M.,**  
759 **Havula, E., Moussaieff, A., Vodala, S., et al. (2015).** The transcription factor Cabut coordinates  
760 energy metabolism and the circadian clock in response to sugar sensing. *EMBO J.* **34**, 1538–1553.
- 761 **Belacortu, Y., Weiss, R., Kadener, S. and Paricio, N. (2012).** Transcriptional activity and nuclear  
762 localization of cabut, the *Drosophila* ortholog of vertebrate TGF- $\beta$ -Inducible Early-Response gene  
763 (TIEG) proteins. *PLoS One* **7**, e32004.
- 764 **Brand, A. H. and Perrimon, N. (1993).** Targeted gene expression as a means of altering cell fates and  
765 generating dominant phenotypes. *Development* **118**, 401–15.
- 766 **Brown, J. L., Mucci, D., Whiteley, M., Dirksen, M. L. and Kassis, J. A. (1998).** The *Drosophila*  
767 polycomb group gene pleiohomeotic encodes a DNA binding protein with homology to the  
768 transcription factor YY1. *Mol. Cell* **1**, 1057–1064.
- 769 **Brown, M. K., Strus, E. and Naidoo, N. (2017).** Reduced sleep during social isolation leads to cellular  
770 stress and induction of the unfolded protein response. *Sleep* **40**, 7.
- 771 **Burke, C. J., Huetteroth, W., Oswald, D., Perisse, E., Krashes, M. J., Das, G., Gohl, D., Silies, M.,**  
772 **Certel, S. and Waddell, S. (2012).** Layered reward signalling through octopamine and dopamine in  
773 *Drosophila*. *Nature* **492**, 433–437.
- 774 **Cacioppo, J. T., Ernst, J. M., Burleson, M. H., McClintock, M. K., Malarkey, W. B., Hawkley, L. C.,**  
775 **Kowalewski, R. B., Paulsen, A., Hobson, J. A., Hugdahl, K., et al. (2000).** Lonely traits and



## Social epigenetic effects in dopaminergic neurons

- 776 concomitant physiological processes: The MacArthur social neuroscience studies. *Int. J.*  
777 *Psychophysiol.* **35**, 143–154.
- 778 **Champagne, F. A.** (2010). Epigenetic influence of social experiences across the lifespan. *Dev. Psychobiol.*  
779 **52**, 299–311.
- 780 **Chase, K. A. and Sharma, R. P.** (2013). Nicotine induces chromatin remodelling through decreases in the  
781 methyltransferases GLP, G9a, Setdb1 and levels of H3K9me2. *Int. J. Neuropsychopharmacol.* **16**,  
782 1129–38.
- 783 **Chen, X., Rahman, R., Guo, F. and Rosbash, M.** (2016). Genome-wide identification of neuronal  
784 activity-regulated genes in *Drosophila*. *Elife* **5**, e19942.
- 785 **Cirelli, C. and Tononi, G.** (1998). Differences in gene expression between sleep and waking as revealed  
786 by mRNA differential display. *Mol. Brain Res.* **56**, 293–305.
- 787 **Croset, V., Treiber, C. D. and Waddell, S.** (2018). Cellular diversity in the *Drosophila* midbrain revealed  
788 by single-cell transcriptomics. *Elife* **7**, e34550.
- 789 **David, A. C., Marie-Laure, C., Thomas, J. and Reinberg, D.** (2015). *Epigenetics, 2nd Edition*. Cold  
790 Spring Harbor Laboratory Press.
- 791 **Davis, M. M., Yang, P., Chen, L., O’Keefe, S. L. and Hodgetts, R. B.** (2007). The orphan nuclear  
792 receptor DHR38 influences transcription of the DOPA decarboxylase gene in epidermal and neural  
793 tissues of *Drosophila melanogaster*. *Genome* **50**, 1049–1060.
- 794 **Deal, R. B. and Henikoff, S.** (2010). A simple method for gene expression and chromatin profiling of  
795 individual cell types within a tissue. *Dev. Cell* **18**, 1030–1040.
- 796 **Dembélé, D. and Kastner, P.** (2014). Fold change rank ordering statistics : a new method for detecting  
797 differentially expressed genes. *BMC Bioinformatics* **15**,
- 798 **Dobin, A., Davis, C. a., Schlesinger, F., Drenkow, J., Zaleski, C., Jha, S., Batut, P., Chaisson, M. and**  
799 **Gingeras, T. R.** (2013). STAR: ultrafast universal RNA-seq aligner. *Bioinformatics* **29**, 15–21.

## Social epigenetic effects in dopaminergic neurons

- 800 **Donelson, N., Kim, E. Z., Slawson, J. B., Vecsey, C. G., Huber, R. and Griffith, L. C.** (2012). High-  
801 resolution positional tracking for long-term analysis of *Drosophila* sleep and locomotion using the  
802 “tracker” program. *PLoS One* **7**, e37250.
- 803 **Dos Santos, G., Schroeder, A. J., Goodman, J. L., Strelets, V. B., Crosby, M. A., Thurmond, J.,**  
804 **Emmert, D. B., Gelbart, W. M., Brown, N. H., Kaufman, T., et al.** (2015). FlyBase: Introduction of  
805 the *Drosophila melanogaster* Release 6 reference genome assembly and large-scale migration of  
806 genome annotations. *Nucleic Acids Res.* **43**, D690–D697.
- 807 **Eden, E., Navon, R., Steinfeld, I., Lipson, D. and Yakhini, Z.** (2009). GOrilla: A tool for discovery and  
808 visualization of enriched GO terms in ranked gene lists. *BMC Bioinformatics* **10**, 48.
- 809 **Eells, J. B., Wilcots, J., Sisk, S. and Guo-Ross, S. X.** (2012). NR4A gene expression is dynamically  
810 regulated in the ventral tegmental area dopamine neurons and is related to expression of dopamine  
811 neurotransmission genes. *J. Mol. Neurosci.* **46**, 545–553.
- 812 **Emmert-Buck, M. R., Bonner, R. F., Smith, P. D., Chuaqui, R. F., Zhuang, Z., Goldstein, S. R.,**  
813 **Weiss, R. A. and Liotta, L. A.** (1996). Laser Capture Microdissection. *Science* **274**, 998–1001.
- 814 **Enuameh, M. S., Asriyan, Y., Richards, A., Christensen, R. G., Hall, V. L., Kazemian, M., Zhu, C.,**  
815 **Pham, H., Cheng, Q., Blatti, C., et al.** (2013). Global analysis of *Drosophila* Cys2 -His2 zinc finger  
816 proteins reveals a multitude of novel recognition motifs and binding determinants. *Genome Res.* **23**,  
817 928–940.
- 818 **Etheredge, J., Baumann, A. and Truman, J. W.** (2018). Fluorescent reporter combination optimization  
819 for flow cytometry purity of labeled *Drosophila* neurons.  
820 <https://doi.org/10.6084/m9.figshare.6934250.v1>.
- 821 **Febinger, H. Y., George, A., Priestley, J., Toth, L. A. and Opp, M. R.** (2014). Effects of housing  
822 condition and cage change on characteristics of sleep in mice. *J. Am. Assoc. Lab. Anim. Sci.* **53**, 29–  
823 37.

Social epigenetic effects in dopaminergic neurons

- 824 **Feng, J., Wilkinson, M., Liu, X., Purushothaman, I., Ferguson, D., Vialou, V., Maze, I., Shao, N.,**  
825 **Kennedy, P., Koo, J., et al. (2014).** Chronic cocaine-regulated epigenomic changes in mouse nucleus  
826 accumbens. *Genome Biol.* **15**, R65.
- 827 **Ferguson, C. J., Averill, P. M., Rhoades, H., Rocha, D., Gruber, N. P. and Gummattira, P. (2005).**  
828 Social isolation, impulsivity and depression as predictors of aggression in a psychiatric inpatient  
829 population. *Psychiatr. Q.* **76**, 123–137.
- 830 **Ferrai, C., Torlai Triglia, E., Risner-Janiczek, J. R., Rito, T., Rackham, O. J., de Santiago, I.,**  
831 **Kukalev, A., Nicodemi, M., Akalin, A., Li, M., et al. (2017).** RNA polymerase II primes Polycomb-  
832 repressed developmental genes throughout terminal neuronal differentiation. *Mol. Syst. Biol.* **13**, 946.
- 833 **Fitzsimons, H. L., Schwartz, S., Given, F. M. and Scott, M. J. (2013).** The histone deacetylase HDAC4  
834 regulates long-term memory in *Drosophila*. *PLoS One* **8**, e83903.
- 835 **Friedman, E. M. (2011).** Sleep quality, social well-being, gender, and inflammation: An integrative  
836 analysis in a national sample. *Ann. N. Y. Acad. Sci.* **1231**, 23–34.
- 837 **Friggi-Grelin, F., Coulom, H., Meller, M., Gomez, D., Hirsh, J. and Birman, S. (2003).** Targeted gene  
838 expression in *Drosophila* dopaminergic cells using regulatory sequences from tyrosine hydroxylase. *J.*  
839 *Neurobiol.* **54**, 618–27.
- 840 **Ganguly-Fitzgerald, I., Donlea, J. and Shaw, P. J. (2006).** Waking experience affects sleep need in  
841 *Drosophila*. *Science* **313**, 1775–81.
- 842 **Ghezzi, A., Krishnan, H. R., Lew, L., Prado, F. J., Ong, D. S. and Atkinson, N. S. (2013).** Alcohol-  
843 induced histone acetylation reveals a gene network involved in alcohol tolerance. *PLoS Genet.* **9**,  
844 e1003986.
- 845 **Gozen, O., Balkan, B., Yildirim, E., Koylu, E. O. and Pogun, S. (2013).** The epigenetic effect of nicotine  
846 on dopamine D1 receptor expression in rat prefrontal cortex. *Synapse* **67**, 545–52.
- 847 **Grant, C. E., Bailey, T. L. and Noble, W. S. (2011).** FIMO: Scanning for occurrences of a given motif.

Social epigenetic effects in dopaminergic neurons

- 848 *Bioinformatics* **27**, 1017–1018.
- 849 **Greco, A. M., Gambardella, P., Sticchi, R., Federico, N. and Pansini, V. S.** (1988). Chronic  
850 Administration of Imipramine Antagonizes Deranged Circadian Rhythm Phases in Individually  
851 Housed Rats. *Physiol. Behav.* 67–72.
- 852 **Grippo, A. J., Cushing, B. S. and Carter, C. S.** (2007). Depression-like behavior and stressor-induced  
853 neuroendocrine activation in female prairie voles exposed to chronic social isolation. *Psychosom Med*  
854 **69**, 149–157.
- 855 **Gupta, T., Morgan, H. R., Andrews, J. C., Brewer, E. R. and Certel, S. J.** (2017). Methyl-CpG binding  
856 domain proteins inhibit interspecies courtship and promote aggression in *Drosophila*. *Sci. Rep.* **7**,  
857 5420.
- 858 **Hall, F. S.** (1998). Social Deprivation of Neonatal, Adolescent, and Adult Rats Has Distinct  
859 Neurochemical and Behavioral Consequence. *Crit. Rev. Neurobiol.* **12**, 129–62.
- 860 **Hall, F. S., Wilkinson, L. S., Humby, T., Inglis, W., Kendall, D. A., Marsden, C. A. and Robbins, T.**  
861 **W.** (1998). Isolation rearing in rats: Pre- and postsynaptic changes in striatal dopaminergic systems.  
862 *Pharmacol. Biochem. Behav.* **59**, 859–872.
- 863 **Hartigan, J. A. and Wong, M. A.** (1979). Algorithm AS 136 A K-Means Clustering Algorithm. *J. R. Stat.*  
864 *Soc. Ser. C (Applied Stat.)* **28**, 100–108.
- 865 **Hempel, C. M., Sugino, K. and Nelson, S. B.** (2007). A manual method for the purification of  
866 fluorescently labeled neurons from the mammalian brain. *Nat. Protoc.* **2**, 2924–2929.
- 867 **Hendricks, J. C., Finn, S. M., Panckeri, K. A., Chavkin, J., Williams, J. A., Sehgal, A. and Pack, A. I.**  
868 (2000). Rest in *Drosophila* Is a Sleep-like State. *Neuron* **25**, 129–138.
- 869 **Henry, G. L., Davis, F. P., Picard, S. and Eddy, S. R.** (2012). Cell type-specific genomics of *Drosophila*  
870 neurons. *Nucleic Acids Res.* **40**, 9691–704.
- 871 **Hu, Y., Flockhart, I., Vinayagam, A., Bergwitz, C., Berger, B., Perrimon, N. and Mohr, S. E.** (2011).

## Social epigenetic effects in dopaminergic neurons

- 872 An integrative approach to ortholog prediction for disease-focused and other functional studies. *BMC*  
873 *Bioinformatics* **12**, 357.
- 874 **Huang, D. W., Sherman, B. T. and Lempicki, R. A.** (2009). Systematic and integrative analysis of large  
875 gene lists using DAVID bioinformatics resources. *Nat. Protoc.* **4**, 44–57.
- 876 **Johnson, A. A., Sarthi, J., Pirooznia, S. K., Reube, W. and Elefant, F.** (2010). Increasing Tip60 HAT  
877 Levels Rescues Axonal Transport Defects and Associated Behavioral Phenotypes in a Drosophila  
878 Alzheimer 's Disease Model. *J. Neurosci.* **33**, 7535–7547.
- 879 **Jones, G. H., Hernandez, T. D., Kendall, D. A., Marsden, C. A. and Robbins, T. W.** (1992).  
880 Dopaminergic and serotonergic function following isolation rearing in rats: Study of behavioural  
881 responses and postmortem and in vivo neurochemistry. *Pharmacol. Biochem. Behav.* **43**, 17–35.
- 882 **Jung, Y., Hsieh, L. S., Lee, A. M., Zhou, Z., Coman, D., Heath, C. J., Hyder, F., Mineur, Y. S., Yuan,  
883 Q., Goldman, D., et al.** (2016). An epigenetic mechanism mediates developmental nicotine effects on  
884 neuronal structure and behavior. *Nat. Neurosci.* **19**, 905–914.
- 885 **Kaba, F., Lewis, A., Glowa-Kollisch, S., Hadler, J., Lee, D., Alper, H., Selling, D., MacDonald, R.,  
886 Solimo, A., Parsons, A., et al.** (2014). Solitary confinement and risk of self-harm among jail inmates.  
887 *Am. J. Public Health* **104**, 442–447.
- 888 **Kadkhodaei, B., Ito, T., Joodmardi, E., Mattsson, B., Rouillard, C., Carta, M., Muramatsu, S.-I.,  
889 Sumi-Ichinose, C., Nomura, T., Metzger, D., et al.** (2009). Nurr1 Is Required for Maintenance of  
890 Maturing and Adult Midbrain Dopamine Neurons. *J. Neurosci.* **29**, 15923–15932.
- 891 **Kar, G., Kim, J. K., Kolodziejczyk, A. A., Natarajan, K. N., Triglia, E. T., Mifsud, B., Elderkin, S.,  
892 Marioni, J. C., Pombo, A. and Teichmann, S. A.** (2017). Flipping between Polycomb repressed and  
893 active transcriptional states introduces noise in gene expression. *Nat. Commun.* **8**.
- 894 **Kayala, M. A. and Baldi, P.** (2012). Cyber-T web server: Differential analysis of high-throughput data.  
895 *Nucleic Acids Res.* **40**, 553–559.

Social epigenetic effects in dopaminergic neurons

- 896 **Kharchenko, P. V., Alekseyenko, A. A., Schwartz, Y. B., Minoda, A., Riddle, N. C., Ernst, J., Sabo, P.**  
897 **J., Larschan, E., Gorchakov, A. A., Gu, T., et al.** (2011). Comprehensive analysis of the chromatin  
898 landscape in *Drosophila melanogaster*. *Nature* **471**, 480–5.
- 899 **Kim, J., Shin, S., Subramaniam, M., Bruinsma, E., Kim, T. D., Hawse, J. R., Spelsberg, T. C. and**  
900 **Janknecht, R.** (2010). Histone demethylase JARID1B/KDM5B is a corepressor of TIEG1/KLF10.  
901 *Biochem. Biophys. Res. Commun.* **401**, 412–416.
- 902 **Koemans, T. S., Kleefstra, T., Chubak, M. C., Stone, M. H., F Reijnders, M. R., de Munnik, S.,**  
903 **Willemsen, M. H., Fenckova, M., R M Stumpel, C. T., Bok, L. A., et al.** (2017). Functional  
904 convergence of histone methyltransferases EHMT1 and KMT2C involved in intellectual disability and  
905 autism spectrum disorder. *PLoS Genet.* 1–24.
- 906 **Kramer, J. M., Kochinke, K., Oortveld, M. a W., Marks, H., Kramer, D., de Jong, E. K., Asztalos, Z.,**  
907 **Westwood, J. T., Stunnenberg, H. G., Sokolowski, M. B., et al.** (2011). Epigenetic regulation of  
908 learning and memory by *Drosophila* EHMT/G9a. *PLoS Biol.* **9**, e1000569.
- 909 **Langmead, B.** (2010). Aligning short sequencing reads with Bowtie. *Curr. Protoc. Bioinforma.* **32**, 11.7.1-  
910 11.7.14.
- 911 **Liao, Y., Smyth, G. K. and Shi, W.** (2013). The Subread aligner: Fast, accurate and scalable read mapping  
912 by seed-and-vote. *Nucleic Acids Res.* **41**, e108.
- 913 **Liu, Q., Liu, S., Kodama, L., Driscoll, M. R. and Wu, M. N.** (2012a). Two Dopaminergic Neurons  
914 Signal to the Dorsal Fan-Shaped Body to Promote Wakefulness in *Drosophila*. *Curr. Biol.* **22**, 2114–  
915 2123.
- 916 **Liu, C., Plaçaais, P. Y., Yamagata, N., Pfeiffer, B. D., Aso, Y., Friedrich, A. B., Siwanowicz, I., Rubin,**  
917 **G. M., Preat, T. and Tanimoto, H.** (2012b). A subset of dopamine neurons signals reward for odour  
918 memory in *Drosophila*. *Nature* **488**, 512–516.
- 919 **Ma, J. and Weake, V. M.** (2014). Affinity-based isolation of tagged nuclei from *Drosophila* tissues for

## Social epigenetic effects in dopaminergic neurons

- 920 gene expression analysis. *J. Vis. Exp.* 1–9.
- 921 **Maze, I., Shen, L., Zhang, B., Garcia, B. a, Shao, N., Mitchell, A., Sun, H., Akbarian, S., Allis, C. D.**  
922 **and Nestler, E. J.** (2014). Analytical tools and current challenges in the modern era of  
923 neuroepigenomics. *Nat. Neurosci.* **17**, 1476–1490.
- 924 **McGowan, P. O. and Szyf, M.** (2010). The epigenetics of social adversity in early life: Implications for  
925 mental health outcomes. *Neurobiol. Dis.* **39**, 66–72.
- 926 **Mikkelsen, T. S., Ku, M., Jaffe, D. B., Issac, B., Lieberman, E., Giannoukos, G., Alvarez, P.,**  
927 **Brockman, W., Kim, T.-K., Koche, R. P., et al.** (2007). Genome-wide maps of chromatin state in  
928 pluripotent and lineage-committed cells. *Nature* **448**, 553–560.
- 929 **Mo, A., Mukamel, E. A., Davis, F. P., Luo, C., Henry, G. L., Picard, S., Urich, M. A., Nery, J. R.,**  
930 **Sejnowski, T. J., Lister, R., et al.** (2015). Epigenomic Signatures of Neuronal Diversity in the  
931 Mammalian Brain. *Neuron* **86**, 1369–1384.
- 932 **Mo, A., Luo, C., Davis, F. P., Mukamel, E. A., Henry, G. L., Nery, J. R., Urich, M. A., Picard, S.,**  
933 **Lister, R., Eddy, S. R., et al.** (2016). Epigenomic landscapes of retinal rods and cones. *Elife* **5**, 1–29.
- 934 **Muñoz-Descalzo, S., Belacortu, Y. and Paricio, N.** (2007). Identification and analysis of cabut orthologs  
935 in invertebrates and vertebrates. *Dev. Genes Evol.* **217**, 289–298.
- 936 **Nagoshi, E., Sugino, K., Kula, E., Okazaki, E., Tachibana, T., Nelson, S. and Rosbash, M.** (2010).  
937 Dissecting differential gene expression within the circadian neuronal circuit of *Drosophila*. *Nat.*  
938 *Neurosci.* **13**, 60–8.
- 939 **Nitta, K. R., Jolma, A., Yin, Y., Morgunova, E., Kivioja, T., Akhtar, J., Hens, K., Toivonen, J.,**  
940 **Deplancke, B., Furlong, E. E. M., et al.** (2015). Conservation of transcription factor binding  
941 specificities across 600 million years of bilateria evolution. *Elife* **4**, e04837.
- 942 **Niwa, M., Jaaro-Peled, H., Tankou, S., Seshadri, S., Hikida, T., Matsumoto, Y., Cascella, N. G.,**  
943 **Kano, S., Ozaki, N., Nabeshima, T., et al.** (2013). Adolescent Stress–Induced Epigenetic Control of



## Social epigenetic effects in dopaminergic neurons

- 944 Dopaminergic Neurons via Glucocorticoids. *Science* **339**, 335–340.
- 945 **Niwa, M., Lee, R. S., Tanaka, T., Okada, K., Kano, S. I. and Sawa, A.** (2016). A critical period of  
946 vulnerability to adolescent stress: Epigenetic mediators in mesocortical dopaminergic neurons. *Hum.*  
947 *Mol. Genet.* **25**, 1370–1381.
- 948 **Perkins, L. A., Holderbaum, L., Tao, R., Hu, Y., Sopko, R., McCall, K., Yang-Zhou, D., Flockhart, I.,**  
949 **Binari, R., Shim, H. S., et al.** (2015). The transgenic RNAi project at Harvard medical school:  
950 Resources and validation. *Genetics* **201**, 843–852.
- 951 **Perry, S., Kiragasi, B., Dickman, D., Perry, S., Kiragasi, B., Dickman, D. and Ray, A.** (2017). The  
952 Role of Histone Deacetylase 6 in Synaptic Plasticity and Memory. *Cell Rep.* **18**, 1337–1345.
- 953 **Pfeiffer, B. D., Truman, J. W. and Rubin, G. M.** (2012). Using translational enhancers to increase  
954 transgene expression in *Drosophila*. *Proc. Natl. Acad. Sci.* **109**, 6626–6631.
- 955 **Pimentel, D., Donlea, J. M., Talbot, C. B., Song, S. M., Thurston, A. J. F. and Miesenböck, G.** (2016).  
956 Operation of a homeostatic sleep switch. *Nature* **536**, 333–337.
- 957 **Pusalkar, M., Suri, D., Kelkar, A., Bhattacharya, A., Galande, S. and Vaidya, V. A.** (2015). Early  
958 stress evokes dysregulation of histone modifiers in the medial prefrontal cortex across the life span.  
959 *Dev. Psychobiol.*
- 960 **R Core Team** (2014). R: A Language and Environment for Statistical Computing. *R Found. Stat. Comput.*  
961 **Vienna,**
- 962 **Reeves, R. and Tamburello, A.** (2014). Single cells, segregated housing, and suicide in the New Jersey  
963 Department of Corrections. *J. Am. Acad. Psychiatry Law* **42**, 484–488.
- 964 **Renthal, W., Kumar, A., Xiao, G., Wilkinson, M., Covington, H. E., Maze, I., Sikder, D., Robison, A.**  
965 **J., LaPlant, Q., Dietz, D. M., et al.** (2009). Genome-wide analysis of chromatin regulation by  
966 cocaine reveals a role for sirtuins. *Neuron* **62**, 335–48.
- 967 **Robinson, M. D., McCarthy, D. J. and Smyth, G. K.** (2010). edgeR: a Bioconductor package for

## Social epigenetic effects in dopaminergic neurons

- 968 differential expression analysis of digital gene expression data. *Bioinformatics* **26**, 139–140.
- 969 **Rodriguez, M. S., Dargemont, C. and Stutz, F.** (2004). Nuclear export of RNA. *Biol. Cell* **96**, 639–655.
- 970 **Sasagawa, T., Horii-Hayashi, N., Okuda, A., Hashimoto, T., Azuma, C. and Nishi, M.** (2017). Long-  
971 term effects of maternal separation coupled with social isolation on reward seeking and changes in  
972 dopamine D1 receptor expression in the nucleus accumbens via DNA methylation in mice. *Neurosci.*  
973 *Lett.* **641**, 33–39.
- 974 **Schwartz, S., Truglio, M., Scott, M. J. and Fitzsimons, H. L.** (2016). Long-Term Memory in *Drosophila*  
975 Is Influenced by Histone Deacetylase HDAC4 Interacting with SUMO-Conjugating Enzyme Ubc9.  
976 *Genetics* **203**, 1249–1264.
- 977 **Shaw, P. J., Cirelli, C., Greenspan, R. J., Tononi, G., Campbell, S. S., Tobler, I., Zepelin, H.,**  
978 **Rechtschaffen, A., Rechtschaffen, A., Tobler, I., et al.** (2000). Correlates of sleep and waking in  
979 *Drosophila melanogaster*. *Science* **287**, 1834–7.
- 980 **Shen, L., Shao, N.-Y., Liu, X., Maze, I., Feng, J. and Nestler, E. J.** (2013). diffReps: Detecting  
981 Differential Chromatin Modification Sites from ChIP-seq Data with Biological Replicates. *PLoS One*  
982 **8**, e65598.
- 983 **Shen, L., Shao, N., Liu, X. and Nestler, E.** (2014). ngs.plot: Quick mining and visualization of next-  
984 generation sequencing data by integrating genomic databases. *BMC Genomics* **15**, 284.
- 985 **Singh, A. S., Shah, A. and Brockmann, A.** (2018). Honey bee foraging induces upregulation of early  
986 growth response protein 1 , hormone receptor 38 and candidate downstream genes of the ecdysteroid  
987 signalling pathway. *Insect Mol. Biol.* **27**, 90–98.
- 988 **Sitaraman, D., Aso, Y., Rubin, G. M. and Nitabach, M. N.** (2015). Control of Sleep by Dopaminergic  
989 Inputs to the *Drosophila* Mushroom Body. *Front. Neural Circuits* **9**, 1–8.
- 990 **Siuda, D., Wu, Z., Chen, Y., Guo, L., Linke, M., Zechner, U., Xia, N., Reifenberg, G., Kleinert, H.,**  
991 **Forstermann, U., et al.** (2014). Social isolation-induced epigenetic changes in midbrain of adult

## Social epigenetic effects in dopaminergic neurons

- 992 mice. *J. Physiol. Pharmacol.* **65**, 247–55.
- 993 **Spain, M. M., Caruso, J. A., Swaminathan, A. and Pile, L. A.** (2010). Drosophila SIN3 isoforms interact  
994 with distinct proteins and have unique biological functions. *J. Biol. Chem.* **285**, 27457–27467.
- 995 **Spittau, B., Wang, Z., Boinska, B. and Krieglstein, K.** (2007). Functional domains of the TGF- $\beta$ -  
996 inducible transcription factor Tieg3 and detection of two putative nuclear localization signals within  
997 the zinc finger DNA-binding domain. *J. Cell. Biochem.* **101**, 712–722.
- 998 **Steiner, F. A., Talbert, P. B., Kasinathan, S., Deal, R. B. and Henikoff, S.** (2012). Cell-type-specific  
999 nuclei purification from whole animals for genome-wide expression and chromatin profiling. *Genome*  
1000 *Res.* **22**, 766–777.
- 1001 **Taniguchi, H. and Moore, A. W.** (2014). Chromatin regulators in neurodevelopment and disease:  
1002 Analysis of fly neural circuits provides insights: Networks of chromatin regulators and transcription  
1003 factors underlie Drosophila neurogenesis and cognitive defects in intellectual disability and neuro.  
1004 *BioEssays* **36**, 872–83.
- 1005 **Trapnell, C., Roberts, A., Goff, L., Pertea, G., Kim, D., Kelley, D. R., Pimentel, H., Salzberg, S. L.,**  
1006 **Rinn, J. L. and Pachter, L.** (2012). Differential gene and transcript expression analysis of RNA-seq  
1007 experiments with TopHat and Cufflinks. *Nat. Protoc.* **7**, 562–78.
- 1008 **Ueno, T., Tomita, J., Tanimoto, H., Endo, K., Ito, K., Kume, S. and Kume, K.** (2012). Identification of  
1009 a dopamine pathway that regulates sleep and arousal in Drosophila. *Nat. Neurosci.* **15**, 1516–1523.
- 1010 **Valzania, A., Catale, C., Viscomi, M. T., Puglisi-Allegra, S. and Carola, V.** (2017). Histone deacetylase  
1011 5 modulates the effects of social adversity in early life on cocaine-induced behavior. *Physiol. Behav.*  
1012 **171**, 7–12.
- 1013 **van der Voet, M., Nijhof, B., Oortveld, M. A. W. and Schenck, A.** (2014). Drosophila models of early  
1014 onset cognitive disorders and their clinical applications. *Neurosci. Biobehav. Rev.* **46**, 326–342.
- 1015 **Waddell, S.** (2013). Reinforcement signalling in Drosophila; dopamine does it all after all. *Curr. Opin.*

## Social epigenetic effects in dopaminergic neurons

- 1016 *Neurobiol.* **23**, 324–329.
- 1017 **Wallace, D. L., Han, M.-H., Graham, D. L., Green, T. a, Vialou, V., Iñiguez, S. D., Cao, J.-L., Kirk,**  
1018 **A., Chakravarty, S., Kumar, A., et al.** (2009). CREB regulation of nucleus accumbens excitability  
1019 mediates social isolation-induced behavioral deficits. *Nat. Neurosci.* **12**, 200–9.
- 1020 **Wang, Y., Krishnan, H. R., Ghezzi, A., Yin, J. C. P. and Atkinson, N. S.** (2007). Drug-induced  
1021 epigenetic changes produce drug tolerance. *PLoS Biol.* **5**, e265.
- 1022 **Weaver, I. C. G., Cervoni, N., Champagne, F. a, D’Alessio, A. C., Sharma, S., Seckl, J. R., Dymov, S.,**  
1023 **Szyf, M. and Meaney, M. J.** (2004). Epigenetic programming by maternal behavior. *Nat. Neurosci.* **7**,  
1024 847–54.
- 1025 **White, K. E., Humphrey, D. M. and Hirth, F.** (2010). The dopaminergic system in the aging brain of  
1026 *Drosophila*. *Front. Neurosci.* **4**, 1–12.
- 1027 **Xu, S., Grullon, S., Ge, K. and Peng, W.** (2014a). Spatial Clustering for Identification of ChIP-Enriched  
1028 Regions (SICER) to Map Regions of Histone Methylation Patterns in Embryonic Stem Cells. *Methods*  
1029 *Mol. Biol.* **1150**, 97–111.
- 1030 **Xu, S., Wilf, R., Menon, T., Panikker, P., Sarthi, J. and Elefant, F.** (2014b). Epigenetic control of  
1031 learning and memory in drosophila by Tip60 HAT action. *Genetics* **198**, 1571–86.
- 1032 **Ye, Y., Li, M., Gu, L., Chen, X., Shi, J., Zhang, X. and Jiang, C.** (2017). Chromatin remodeling during  
1033 in vivo neural stem cells differentiating to neurons in early *Drosophila* embryos. *Cell Death Differ.* **24**,  
1034 409–420.
- 1035 **Zang, C., Schones, D. E., Zeng, C., Cui, K., Zhao, K. and Peng, W.** (2009). A clustering approach for  
1036 identification of enriched domains from histone modification ChIP-Seq data. *Bioinformatics* **25**, 1952–  
1037 1958.
- 1038 **Zetterström, R. H., Williams, R., Perlmann, T. and Olson, L.** (1996). Cellular expression of the  
1039 immediate early transcription factors Nurr1 and NGFI-B suggests a gene regulatory role in several

## Social epigenetic effects in dopaminergic neurons

- 1040 brain regions including the nigrostriatal dopamine system. *Mol. Brain Res.* **41**, 111–120.
- 1041 **Zhu, L. J., Christensen, R. G., Kazemian, M., Hull, C. J., Enuameh, M. S., Basciotta, M. D.,**
- 1042 **Brasfield, J. A., Zhu, C., Asriyan, Y., Lapointe, D. S., et al.** (2011). FlyFactorSurvey: A database
- 1043 of *Drosophila* transcription factor binding specificities determined using the bacterial one-hybrid
- 1044 system. *Nucleic Acids Res.* **39**, D111–D117.
- 1045
- 1046
